# Supplementary material
Source: Frontiers journal article supplement (https://www.frontiersin.org/articles/518171)
Supplement: Data_Sheet_1.PDF [file Data_Sheet_1.PDF]

**Table S1. Definitions of built environment variables collected at road traffic crash hotspots**

 **Data Dictionary Codebook**

09/22/2015 10:27pm

| #                      | Variable / Field Name                                            | Field Label<br><i>Field Note</i>                                                                                                                                                                                                                                                                                                                                      | Field Attributes (Field Type, Validation, Choices, Branching Logic, Calculations, etc.)                                                                                                              |   |                |   |                    |    |         |  |  |
|------------------------|------------------------------------------------------------------|-----------------------------------------------------------------------------------------------------------------------------------------------------------------------------------------------------------------------------------------------------------------------------------------------------------------------------------------------------------------------|------------------------------------------------------------------------------------------------------------------------------------------------------------------------------------------------------|---|----------------|---|--------------------|----|---------|--|--|
| Instrument: <b>Bea</b> |                                                                  |                                                                                                                                                                                                                                                                                                                                                                       |                                                                                                                                                                                                      |   |                |   |                    |    |         |  |  |
| 1                      | participant_id                                                   | Participant ID                                                                                                                                                                                                                                                                                                                                                        | text                                                                                                                                                                                                 |   |                |   |                    |    |         |  |  |
| 2                      | road_area                                                        | Type the letter on the map that shows the point where you are collecting data.                                                                                                                                                                                                                                                                                        | text                                                                                                                                                                                                 |   |                |   |                    |    |         |  |  |
| 3                      | road_urban                                                       | What kind of area is the road/point in?<br><i>Choose rural if you think there are very few vehicles, people, and buildings surrounding the point. Choose urban if at the point you feel like you are in a city surrounded by people, vehicles, and buildings.</i>                                                                                                     | radio<br><table border="1"> <tr> <td>0</td> <td>Rural</td> </tr> <tr> <td>1</td> <td>Urban</td> </tr> <tr> <td>99</td> <td>Unknown</td> </tr> </table>                                               | 0 | Rural          | 1 | Urban              | 99 | Unknown |  |  |
| 0                      | Rural                                                            |                                                                                                                                                                                                                                                                                                                                                                       |                                                                                                                                                                                                      |   |                |   |                    |    |         |  |  |
| 1                      | Urban                                                            |                                                                                                                                                                                                                                                                                                                                                                       |                                                                                                                                                                                                      |   |                |   |                    |    |         |  |  |
| 99                     | Unknown                                                          |                                                                                                                                                                                                                                                                                                                                                                       |                                                                                                                                                                                                      |   |                |   |                    |    |         |  |  |
| 4                      | intersections                                                    | Is this point at an intersection/junction?<br><i>Choose yes if this point exists at a junction or intersection of roads, choose no if it is on a road running straight through. A junction is defined by at least two roads coming together. A single road with two directions of traffic does not have a junction even if there is a traffic light or stop sign.</i> | radio<br><table border="1"> <tr> <td>0</td> <td>No</td> </tr> <tr> <td>1</td> <td>Yes</td> </tr> <tr> <td>99</td> <td>Unknown</td> </tr> </table>                                                    | 0 | No             | 1 | Yes                | 99 | Unknown |  |  |
| 0                      | No                                                               |                                                                                                                                                                                                                                                                                                                                                                       |                                                                                                                                                                                                      |   |                |   |                    |    |         |  |  |
| 1                      | Yes                                                              |                                                                                                                                                                                                                                                                                                                                                                       |                                                                                                                                                                                                      |   |                |   |                    |    |         |  |  |
| 99                     | Unknown                                                          |                                                                                                                                                                                                                                                                                                                                                                       |                                                                                                                                                                                                      |   |                |   |                    |    |         |  |  |
| 5                      | compass<br>Show the field ONLY if: [intersections] = '1'         | Open the compass app on your tablet and use it to find the direction North. The road that passes through the direction North should be called A. Turn clockwise and the next road you come to should be B, then C, then D, and so on.                                                                                                                                 | descriptive                                                                                                                                                                                          |   |                |   |                    |    |         |  |  |
| 6                      | intersect_count<br>Show the field ONLY if: [intersections] = '1' | How many roads go through this junction?<br><i>Some examples; Peage is a junction of 2 roads, the wedding rondpoint is a junction of 4 roads, Gishushu/RDB is a junction of 2 roads.</i>                                                                                                                                                                              | radio<br><table border="1"> <tr> <td>1</td> <td>2 - T junction</td> </tr> <tr> <td>2</td> <td>2 - cross junction</td> </tr> <tr> <td>3</td> <td>3</td> </tr> <tr> <td></td> <td></td> </tr> </table> | 1 | 2 - T junction | 2 | 2 - cross junction | 3  | 3       |  |  |
| 1                      | 2 - T junction                                                   |                                                                                                                                                                                                                                                                                                                                                                       |                                                                                                                                                                                                      |   |                |   |                    |    |         |  |  |
| 2                      | 2 - cross junction                                               |                                                                                                                                                                                                                                                                                                                                                                       |                                                                                                                                                                                                      |   |                |   |                    |    |         |  |  |
| 3                      | 3                                                                |                                                                                                                                                                                                                                                                                                                                                                       |                                                                                                                                                                                                      |   |                |   |                    |    |         |  |  |
|                        |                                                                  |                                                                                                                                                                                                                                                                                                                                                                       |                                                                                                                                                                                                      |   |                |   |                    |    |         |  |  |

|    |                                                                                                                                                                                                                                                                                     |                                                                                                                                                                                                                                                                                                                                                                                                                                    |                                                                                                                                                                                                                                                                                                                                          |   |                                      |     |                                     |    |                                                 |    |                   |    |         |
|----|-------------------------------------------------------------------------------------------------------------------------------------------------------------------------------------------------------------------------------------------------------------------------------------|------------------------------------------------------------------------------------------------------------------------------------------------------------------------------------------------------------------------------------------------------------------------------------------------------------------------------------------------------------------------------------------------------------------------------------|------------------------------------------------------------------------------------------------------------------------------------------------------------------------------------------------------------------------------------------------------------------------------------------------------------------------------------------|---|--------------------------------------|-----|-------------------------------------|----|-------------------------------------------------|----|-------------------|----|---------|
|    |                                                                                                                                                                                                                                                                                     |                                                                                                                                                                                                                                                                                                                                                                                                                                    | <table border="1"> <tr><td>4</td><td>4</td></tr> <tr><td>5</td><td>5</td></tr> <tr><td>6</td><td>6</td></tr> <tr><td>99</td><td>Unknown</td></tr> </table>                                                                                                                                                                               | 4 | 4                                    | 5   | 5                                   | 6  | 6                                               | 99 | Unknown           |    |         |
| 4  | 4                                                                                                                                                                                                                                                                                   |                                                                                                                                                                                                                                                                                                                                                                                                                                    |                                                                                                                                                                                                                                                                                                                                          |   |                                      |     |                                     |    |                                                 |    |                   |    |         |
| 5  | 5                                                                                                                                                                                                                                                                                   |                                                                                                                                                                                                                                                                                                                                                                                                                                    |                                                                                                                                                                                                                                                                                                                                          |   |                                      |     |                                     |    |                                                 |    |                   |    |         |
| 6  | 6                                                                                                                                                                                                                                                                                   |                                                                                                                                                                                                                                                                                                                                                                                                                                    |                                                                                                                                                                                                                                                                                                                                          |   |                                      |     |                                     |    |                                                 |    |                   |    |         |
| 99 | Unknown                                                                                                                                                                                                                                                                             |                                                                                                                                                                                                                                                                                                                                                                                                                                    |                                                                                                                                                                                                                                                                                                                                          |   |                                      |     |                                     |    |                                                 |    |                   |    |         |
| 7  | <p><b>aroad_design</b><br/>Show the field ONLY if: [intersections] = '0' or [intersect_count] = '1' or [intersect_count] = '2' or [intersect_count] = '3' or [intersect_count] = '4' or [intersect_count] = '5' or [intersect_count] = '6' or [intersect_count] = '9' or '9'</p>    | <p><b>Design of Roadway a</b><br/><i>Choose highway only if the road has no humps and no traffic lights or stop signs. Large roads in Kigali are Arterials (the road from town to sonatube, from sopetrade to ministry of defense, poidis lour road are all arterials). Collector streets lead to arterials and will be paved. Local streets can be paved or dirt but will never connect directly with an arterial street.</i></p> | <p>radio</p> <table border="1"> <tr><td>0</td><td>Highway</td></tr> <tr><td>1</td><td>Arterial Street</td></tr> <tr><td>2</td><td>Collector Street</td></tr> <tr><td>3</td><td>Local Street</td></tr> <tr><td>99</td><td>Unknown</td></tr> </table>                                                                                      | 0 | Highway                              | 1   | Arterial Street                     | 2  | Collector Street                                | 3  | Local Street      | 99 | Unknown |
| 0  | Highway                                                                                                                                                                                                                                                                             |                                                                                                                                                                                                                                                                                                                                                                                                                                    |                                                                                                                                                                                                                                                                                                                                          |   |                                      |     |                                     |    |                                                 |    |                   |    |         |
| 1  | Arterial Street                                                                                                                                                                                                                                                                     |                                                                                                                                                                                                                                                                                                                                                                                                                                    |                                                                                                                                                                                                                                                                                                                                          |   |                                      |     |                                     |    |                                                 |    |                   |    |         |
| 2  | Collector Street                                                                                                                                                                                                                                                                    |                                                                                                                                                                                                                                                                                                                                                                                                                                    |                                                                                                                                                                                                                                                                                                                                          |   |                                      |     |                                     |    |                                                 |    |                   |    |         |
| 3  | Local Street                                                                                                                                                                                                                                                                        |                                                                                                                                                                                                                                                                                                                                                                                                                                    |                                                                                                                                                                                                                                                                                                                                          |   |                                      |     |                                     |    |                                                 |    |                   |    |         |
| 99 | Unknown                                                                                                                                                                                                                                                                             |                                                                                                                                                                                                                                                                                                                                                                                                                                    |                                                                                                                                                                                                                                                                                                                                          |   |                                      |     |                                     |    |                                                 |    |                   |    |         |
| 8  | <p><b>alane_type</b><br/>Show the field ONLY if: [intersections] = '0' or [intersect_count] = '1' or [intersect_count] = '2' or [intersect_count] = '3' or [intersect_count] = '4' or [intersect_count] = '5' or [intersect_count] = '6' or [intersect_count] = '9' or '9'</p>      | <p><b>Number of lanes in road a</b><br/><i>Count the number of traffic lanes not including lanes meant only for turns or passing -</i></p>                                                                                                                                                                                                                                                                                         | <p>radio</p> <table border="1"> <tr><td>0</td><td>1 lane (single direction of traffic)</td></tr> <tr><td>1</td><td>2 lanes (two directions of traffic)</td></tr> <tr><td>2</td><td>4 lanes (2 lanes for each direction of traffic)</td></tr> <tr><td>3</td><td>More then 4 lanes</td></tr> <tr><td>99</td><td>Unknown</td></tr> </table> | 0 | 1 lane (single direction of traffic) | 1   | 2 lanes (two directions of traffic) | 2  | 4 lanes (2 lanes for each direction of traffic) | 3  | More then 4 lanes | 99 | Unknown |
| 0  | 1 lane (single direction of traffic)                                                                                                                                                                                                                                                |                                                                                                                                                                                                                                                                                                                                                                                                                                    |                                                                                                                                                                                                                                                                                                                                          |   |                                      |     |                                     |    |                                                 |    |                   |    |         |
| 1  | 2 lanes (two directions of traffic)                                                                                                                                                                                                                                                 |                                                                                                                                                                                                                                                                                                                                                                                                                                    |                                                                                                                                                                                                                                                                                                                                          |   |                                      |     |                                     |    |                                                 |    |                   |    |         |
| 2  | 4 lanes (2 lanes for each direction of traffic)                                                                                                                                                                                                                                     |                                                                                                                                                                                                                                                                                                                                                                                                                                    |                                                                                                                                                                                                                                                                                                                                          |   |                                      |     |                                     |    |                                                 |    |                   |    |         |
| 3  | More then 4 lanes                                                                                                                                                                                                                                                                   |                                                                                                                                                                                                                                                                                                                                                                                                                                    |                                                                                                                                                                                                                                                                                                                                          |   |                                      |     |                                     |    |                                                 |    |                   |    |         |
| 99 | Unknown                                                                                                                                                                                                                                                                             |                                                                                                                                                                                                                                                                                                                                                                                                                                    |                                                                                                                                                                                                                                                                                                                                          |   |                                      |     |                                     |    |                                                 |    |                   |    |         |
| 9  | <p><b>aauxiliary_lane</b><br/>Show the field ONLY if: [intersections] = '0' or [intersect_count] = '1' or [intersect_count] = '2' or [intersect_count] = '3' or [intersect_count] = '4' or [intersect_count] = '5' or [intersect_count] = '6' or [intersect_count] = '9' or '9'</p> | <p><b>Auxiliary Lanes of road a</b><br/><i>Answer yes if you see a lane especially for turning or passing.</i></p>                                                                                                                                                                                                                                                                                                                 | <p>radio</p> <table border="1"> <tr><td>0</td><td>No</td></tr> <tr><td>1</td><td>Yes</td></tr> <tr><td>99</td><td>Unknown</td></tr> </table>                                                                                                                                                                                             | 0 | No                                   | 1   | Yes                                 | 99 | Unknown                                         |    |                   |    |         |
| 0  | No                                                                                                                                                                                                                                                                                  |                                                                                                                                                                                                                                                                                                                                                                                                                                    |                                                                                                                                                                                                                                                                                                                                          |   |                                      |     |                                     |    |                                                 |    |                   |    |         |
| 1  | Yes                                                                                                                                                                                                                                                                                 |                                                                                                                                                                                                                                                                                                                                                                                                                                    |                                                                                                                                                                                                                                                                                                                                          |   |                                      |     |                                     |    |                                                 |    |                   |    |         |
| 99 | Unknown                                                                                                                                                                                                                                                                             |                                                                                                                                                                                                                                                                                                                                                                                                                                    |                                                                                                                                                                                                                                                                                                                                          |   |                                      |     |                                     |    |                                                 |    |                   |    |         |
| 10 | <p><b>apavement</b><br/>Show the field ONLY if: [intersections] = '0' or [intersect_count] = '1' or [intersect_count] = '2' or [intersect_count] = '3' or [intersect_count] = '4' or [intersect_count] = '5' or [intersect_count] = '6' or [intersect_count] = '9' or '9'</p>       | <p><b>Road a Paved?</b><br/><i>From where you are standing look down the road in all directions and note the surface of the road - paved or dirt</i></p>                                                                                                                                                                                                                                                                           | <p>radio</p> <table border="1"> <tr><td>0</td><td>Dirt road</td></tr> <tr><td>1</td><td>Partially paved</td></tr> <tr><td>2</td><td>Fully paved</td></tr> <tr><td>99</td><td>Unknown</td></tr> </table>                                                                                                                                  | 0 | Dirt road                            | 1   | Partially paved                     | 2  | Fully paved                                     | 99 | Unknown           |    |         |
| 0  | Dirt road                                                                                                                                                                                                                                                                           |                                                                                                                                                                                                                                                                                                                                                                                                                                    |                                                                                                                                                                                                                                                                                                                                          |   |                                      |     |                                     |    |                                                 |    |                   |    |         |
| 1  | Partially paved                                                                                                                                                                                                                                                                     |                                                                                                                                                                                                                                                                                                                                                                                                                                    |                                                                                                                                                                                                                                                                                                                                          |   |                                      |     |                                     |    |                                                 |    |                   |    |         |
| 2  | Fully paved                                                                                                                                                                                                                                                                         |                                                                                                                                                                                                                                                                                                                                                                                                                                    |                                                                                                                                                                                                                                                                                                                                          |   |                                      |     |                                     |    |                                                 |    |                   |    |         |
| 99 | Unknown                                                                                                                                                                                                                                                                             |                                                                                                                                                                                                                                                                                                                                                                                                                                    |                                                                                                                                                                                                                                                                                                                                          |   |                                      |     |                                     |    |                                                 |    |                   |    |         |
| 11 | <p><b>ard_condition</b><br/>Show the field ONLY if: [intersections] = '0' or [intersect_count]</p>                                                                                                                                                                                  | <p><b>Road a Surface Conditions?</b><br/><i>Select all that apply</i></p>                                                                                                                                                                                                                                                                                                                                                          | <p>checkbox</p> <table border="1"> <tr><td>0</td><td>ard_condition__0</td><td>Dry</td></tr> </table>                                                                                                                                                                                                                                     | 0 | ard_condition__0                     | Dry |                                     |    |                                                 |    |                   |    |         |
| 0  | ard_condition__0                                                                                                                                                                                                                                                                    | Dry                                                                                                                                                                                                                                                                                                                                                                                                                                |                                                                                                                                                                                                                                                                                                                                          |   |                                      |     |                                     |    |                                                 |    |                   |    |         |

|          |                                                                                                                                                                                                                                                          |                                                                                                                                                                                                                                                                                                                          |                                                                                                                                                                                                                                                                                                                                                                                                                                                                                                                                                                                                                                                                                                                                                            |          |                  |     |   |                            |                               |   |                            |                                              |   |                            |                               |    |                   |                              |    |                   |                          |    |              |                             |   |              |                           |    |               |                                |    |               |         |
|----------|----------------------------------------------------------------------------------------------------------------------------------------------------------------------------------------------------------------------------------------------------------|--------------------------------------------------------------------------------------------------------------------------------------------------------------------------------------------------------------------------------------------------------------------------------------------------------------------------|------------------------------------------------------------------------------------------------------------------------------------------------------------------------------------------------------------------------------------------------------------------------------------------------------------------------------------------------------------------------------------------------------------------------------------------------------------------------------------------------------------------------------------------------------------------------------------------------------------------------------------------------------------------------------------------------------------------------------------------------------------|----------|------------------|-----|---|----------------------------|-------------------------------|---|----------------------------|----------------------------------------------|---|----------------------------|-------------------------------|----|-------------------|------------------------------|----|-------------------|--------------------------|----|--------------|-----------------------------|---|--------------|---------------------------|----|---------------|--------------------------------|----|---------------|---------|
|          | tj = '1' or [intersect_count] = '2' or [intersect_count] = '3' or [intersect_count] = '4' or [intersect_count] = '5' or [intersect_count] = '6' or [intersect_count] = '99'                                                                              |                                                                                                                                                                                                                                                                                                                          | <table border="1"> <tr><td>1</td><td>ard_condition__1</td><td>Wet</td></tr> <tr><td>2</td><td>ard_condition__2</td><td>Flooded with water</td></tr> <tr><td>3</td><td>ard_condition__3</td><td>Slippery surface (oil, mud, garbage, leaves)</td></tr> <tr><td>4</td><td>ard_condition__4</td><td>holes</td></tr> <tr><td>90</td><td>ard_condition__90</td><td>Others</td></tr> <tr><td>99</td><td>ard_condition__99</td><td>Unknown</td></tr> </table>                                                                                                                                                                                                                                                                                                     | 1        | ard_condition__1 | Wet | 2 | ard_condition__2           | Flooded with water            | 3 | ard_condition__3           | Slippery surface (oil, mud, garbage, leaves) | 4 | ard_condition__4           | holes                         | 90 | ard_condition__90 | Others                       | 99 | ard_condition__99 | Unknown                  |    |              |                             |   |              |                           |    |               |                                |    |               |         |
| 1        | ard_condition__1                                                                                                                                                                                                                                         | Wet                                                                                                                                                                                                                                                                                                                      |                                                                                                                                                                                                                                                                                                                                                                                                                                                                                                                                                                                                                                                                                                                                                            |          |                  |     |   |                            |                               |   |                            |                                              |   |                            |                               |    |                   |                              |    |                   |                          |    |              |                             |   |              |                           |    |               |                                |    |               |         |
| 2        | ard_condition__2                                                                                                                                                                                                                                         | Flooded with water                                                                                                                                                                                                                                                                                                       |                                                                                                                                                                                                                                                                                                                                                                                                                                                                                                                                                                                                                                                                                                                                                            |          |                  |     |   |                            |                               |   |                            |                                              |   |                            |                               |    |                   |                              |    |                   |                          |    |              |                             |   |              |                           |    |               |                                |    |               |         |
| 3        | ard_condition__3                                                                                                                                                                                                                                         | Slippery surface (oil, mud, garbage, leaves)                                                                                                                                                                                                                                                                             |                                                                                                                                                                                                                                                                                                                                                                                                                                                                                                                                                                                                                                                                                                                                                            |          |                  |     |   |                            |                               |   |                            |                                              |   |                            |                               |    |                   |                              |    |                   |                          |    |              |                             |   |              |                           |    |               |                                |    |               |         |
| 4        | ard_condition__4                                                                                                                                                                                                                                         | holes                                                                                                                                                                                                                                                                                                                    |                                                                                                                                                                                                                                                                                                                                                                                                                                                                                                                                                                                                                                                                                                                                                            |          |                  |     |   |                            |                               |   |                            |                                              |   |                            |                               |    |                   |                              |    |                   |                          |    |              |                             |   |              |                           |    |               |                                |    |               |         |
| 90       | ard_condition__90                                                                                                                                                                                                                                        | Others                                                                                                                                                                                                                                                                                                                   |                                                                                                                                                                                                                                                                                                                                                                                                                                                                                                                                                                                                                                                                                                                                                            |          |                  |     |   |                            |                               |   |                            |                                              |   |                            |                               |    |                   |                              |    |                   |                          |    |              |                             |   |              |                           |    |               |                                |    |               |         |
| 99       | ard_condition__99                                                                                                                                                                                                                                        | Unknown                                                                                                                                                                                                                                                                                                                  |                                                                                                                                                                                                                                                                                                                                                                                                                                                                                                                                                                                                                                                                                                                                                            |          |                  |     |   |                            |                               |   |                            |                                              |   |                            |                               |    |                   |                              |    |                   |                          |    |              |                             |   |              |                           |    |               |                                |    |               |         |
| 12       | ard_marks<br>Show the field ONLY if: [intersections] = '0' or [intersect_count] = '1' or [intersect_count] = '2' or [intersect_count] = '3' or [intersect_count] = '4' or [intersect_count] = '5' or [intersect_count] = '6' or [intersect_count] = '99' | Markings on road a<br><i>Select all that apply</i>                                                                                                                                                                                                                                                                       | <table border="1"> <tr><td colspan="3">checkbox</td></tr> <tr><td>0</td><td>ard_marks__0</td><td>No markings</td></tr> <tr><td>1</td><td>ard_marks__1</td><td>black and white painted edges</td></tr> <tr><td>2</td><td>ard_marks__2</td><td>lane dividers painted on road</td></tr> <tr><td>3</td><td>ard_marks__3</td><td>turning lanes marked on road</td></tr> <tr><td>4</td><td>ard_marks__4</td><td>reflectors on road edges</td></tr> <tr><td>5</td><td>ard_marks__5</td><td>reflectors down road center</td></tr> <tr><td>6</td><td>ard_marks__6</td><td>unpainted roadside bricks</td></tr> <tr><td>90</td><td>ard_marks__90</td><td>other traffic markings on road</td></tr> <tr><td>99</td><td>ard_marks__99</td><td>unknown</td></tr> </table> | checkbox |                  |     | 0 | ard_marks__0               | No markings                   | 1 | ard_marks__1               | black and white painted edges                | 2 | ard_marks__2               | lane dividers painted on road | 3  | ard_marks__3      | turning lanes marked on road | 4  | ard_marks__4      | reflectors on road edges | 5  | ard_marks__5 | reflectors down road center | 6 | ard_marks__6 | unpainted roadside bricks | 90 | ard_marks__90 | other traffic markings on road | 99 | ard_marks__99 | unknown |
| checkbox |                                                                                                                                                                                                                                                          |                                                                                                                                                                                                                                                                                                                          |                                                                                                                                                                                                                                                                                                                                                                                                                                                                                                                                                                                                                                                                                                                                                            |          |                  |     |   |                            |                               |   |                            |                                              |   |                            |                               |    |                   |                              |    |                   |                          |    |              |                             |   |              |                           |    |               |                                |    |               |         |
| 0        | ard_marks__0                                                                                                                                                                                                                                             | No markings                                                                                                                                                                                                                                                                                                              |                                                                                                                                                                                                                                                                                                                                                                                                                                                                                                                                                                                                                                                                                                                                                            |          |                  |     |   |                            |                               |   |                            |                                              |   |                            |                               |    |                   |                              |    |                   |                          |    |              |                             |   |              |                           |    |               |                                |    |               |         |
| 1        | ard_marks__1                                                                                                                                                                                                                                             | black and white painted edges                                                                                                                                                                                                                                                                                            |                                                                                                                                                                                                                                                                                                                                                                                                                                                                                                                                                                                                                                                                                                                                                            |          |                  |     |   |                            |                               |   |                            |                                              |   |                            |                               |    |                   |                              |    |                   |                          |    |              |                             |   |              |                           |    |               |                                |    |               |         |
| 2        | ard_marks__2                                                                                                                                                                                                                                             | lane dividers painted on road                                                                                                                                                                                                                                                                                            |                                                                                                                                                                                                                                                                                                                                                                                                                                                                                                                                                                                                                                                                                                                                                            |          |                  |     |   |                            |                               |   |                            |                                              |   |                            |                               |    |                   |                              |    |                   |                          |    |              |                             |   |              |                           |    |               |                                |    |               |         |
| 3        | ard_marks__3                                                                                                                                                                                                                                             | turning lanes marked on road                                                                                                                                                                                                                                                                                             |                                                                                                                                                                                                                                                                                                                                                                                                                                                                                                                                                                                                                                                                                                                                                            |          |                  |     |   |                            |                               |   |                            |                                              |   |                            |                               |    |                   |                              |    |                   |                          |    |              |                             |   |              |                           |    |               |                                |    |               |         |
| 4        | ard_marks__4                                                                                                                                                                                                                                             | reflectors on road edges                                                                                                                                                                                                                                                                                                 |                                                                                                                                                                                                                                                                                                                                                                                                                                                                                                                                                                                                                                                                                                                                                            |          |                  |     |   |                            |                               |   |                            |                                              |   |                            |                               |    |                   |                              |    |                   |                          |    |              |                             |   |              |                           |    |               |                                |    |               |         |
| 5        | ard_marks__5                                                                                                                                                                                                                                             | reflectors down road center                                                                                                                                                                                                                                                                                              |                                                                                                                                                                                                                                                                                                                                                                                                                                                                                                                                                                                                                                                                                                                                                            |          |                  |     |   |                            |                               |   |                            |                                              |   |                            |                               |    |                   |                              |    |                   |                          |    |              |                             |   |              |                           |    |               |                                |    |               |         |
| 6        | ard_marks__6                                                                                                                                                                                                                                             | unpainted roadside bricks                                                                                                                                                                                                                                                                                                |                                                                                                                                                                                                                                                                                                                                                                                                                                                                                                                                                                                                                                                                                                                                                            |          |                  |     |   |                            |                               |   |                            |                                              |   |                            |                               |    |                   |                              |    |                   |                          |    |              |                             |   |              |                           |    |               |                                |    |               |         |
| 90       | ard_marks__90                                                                                                                                                                                                                                            | other traffic markings on road                                                                                                                                                                                                                                                                                           |                                                                                                                                                                                                                                                                                                                                                                                                                                                                                                                                                                                                                                                                                                                                                            |          |                  |     |   |                            |                               |   |                            |                                              |   |                            |                               |    |                   |                              |    |                   |                          |    |              |                             |   |              |                           |    |               |                                |    |               |         |
| 99       | ard_marks__99                                                                                                                                                                                                                                            | unknown                                                                                                                                                                                                                                                                                                                  |                                                                                                                                                                                                                                                                                                                                                                                                                                                                                                                                                                                                                                                                                                                                                            |          |                  |     |   |                            |                               |   |                            |                                              |   |                            |                               |    |                   |                              |    |                   |                          |    |              |                             |   |              |                           |    |               |                                |    |               |         |
| 13       | apolice<br>Show the field ONLY if: [intersections] = '0' or [intersect_count] = '1' or [intersect_count] = '2' or [intersect_count] = '3' or [intersect_count] = '4' or [intersect_count] = '5' or [intersect_count] = '6' or [intersect_count] = '99'   | Police presence on road a<br><i>Select all that apply</i>                                                                                                                                                                                                                                                                | <table border="1"> <tr><td colspan="3">checkbox</td></tr> <tr><td>0</td><td>apolice__0</td><td>No police</td></tr> <tr><td>1</td><td>apolice__1</td><td>1 officer monitoring area</td></tr> <tr><td>2</td><td>apolice__2</td><td>2 officers monitoring area</td></tr> <tr><td>3</td><td>apolice__3</td><td>officers directing traffic</td></tr> <tr><td>90</td><td>apolice__90</td><td>other</td></tr> <tr><td>99</td><td>apolice__99</td><td>unknown</td></tr> </table>                                                                                                                                                                                                                                                                                   | checkbox |                  |     | 0 | apolice__0                 | No police                     | 1 | apolice__1                 | 1 officer monitoring area                    | 2 | apolice__2                 | 2 officers monitoring area    | 3  | apolice__3        | officers directing traffic   | 90 | apolice__90       | other                    | 99 | apolice__99  | unknown                     |   |              |                           |    |               |                                |    |               |         |
| checkbox |                                                                                                                                                                                                                                                          |                                                                                                                                                                                                                                                                                                                          |                                                                                                                                                                                                                                                                                                                                                                                                                                                                                                                                                                                                                                                                                                                                                            |          |                  |     |   |                            |                               |   |                            |                                              |   |                            |                               |    |                   |                              |    |                   |                          |    |              |                             |   |              |                           |    |               |                                |    |               |         |
| 0        | apolice__0                                                                                                                                                                                                                                               | No police                                                                                                                                                                                                                                                                                                                |                                                                                                                                                                                                                                                                                                                                                                                                                                                                                                                                                                                                                                                                                                                                                            |          |                  |     |   |                            |                               |   |                            |                                              |   |                            |                               |    |                   |                              |    |                   |                          |    |              |                             |   |              |                           |    |               |                                |    |               |         |
| 1        | apolice__1                                                                                                                                                                                                                                               | 1 officer monitoring area                                                                                                                                                                                                                                                                                                |                                                                                                                                                                                                                                                                                                                                                                                                                                                                                                                                                                                                                                                                                                                                                            |          |                  |     |   |                            |                               |   |                            |                                              |   |                            |                               |    |                   |                              |    |                   |                          |    |              |                             |   |              |                           |    |               |                                |    |               |         |
| 2        | apolice__2                                                                                                                                                                                                                                               | 2 officers monitoring area                                                                                                                                                                                                                                                                                               |                                                                                                                                                                                                                                                                                                                                                                                                                                                                                                                                                                                                                                                                                                                                                            |          |                  |     |   |                            |                               |   |                            |                                              |   |                            |                               |    |                   |                              |    |                   |                          |    |              |                             |   |              |                           |    |               |                                |    |               |         |
| 3        | apolice__3                                                                                                                                                                                                                                               | officers directing traffic                                                                                                                                                                                                                                                                                               |                                                                                                                                                                                                                                                                                                                                                                                                                                                                                                                                                                                                                                                                                                                                                            |          |                  |     |   |                            |                               |   |                            |                                              |   |                            |                               |    |                   |                              |    |                   |                          |    |              |                             |   |              |                           |    |               |                                |    |               |         |
| 90       | apolice__90                                                                                                                                                                                                                                              | other                                                                                                                                                                                                                                                                                                                    |                                                                                                                                                                                                                                                                                                                                                                                                                                                                                                                                                                                                                                                                                                                                                            |          |                  |     |   |                            |                               |   |                            |                                              |   |                            |                               |    |                   |                              |    |                   |                          |    |              |                             |   |              |                           |    |               |                                |    |               |         |
| 99       | apolice__99                                                                                                                                                                                                                                              | unknown                                                                                                                                                                                                                                                                                                                  |                                                                                                                                                                                                                                                                                                                                                                                                                                                                                                                                                                                                                                                                                                                                                            |          |                  |     |   |                            |                               |   |                            |                                              |   |                            |                               |    |                   |                              |    |                   |                          |    |              |                             |   |              |                           |    |               |                                |    |               |         |
| 14       | aconflict_intersections<br>Show the field ONLY if: [intersections] = '0' or [intersect_count] = '1' or [intersect_count] = '2' or [intersect_count] = '3' or [intersect_count] = '4' or [intersect_count] = '5' or [intersect_count]                     | Traffic slowing on road a<br><i>Describe this for each road that you evaluate that is part of a junction. Watch the traffic and road options to determine if traffic must slow down to perform movements. Some examples; roundabouts have slowing of traffic due to merging, cross junctions have slowing from turns</i> | <table border="1"> <tr><td colspan="3">checkbox</td></tr> <tr><td>0</td><td>aconflict_intersections__0</td><td>No reason for traffic slowing</td></tr> <tr><td>1</td><td>aconflict_intersections__1</td><td>due to left turns</td></tr> <tr><td>2</td><td>aconflict_intersections__2</td><td>due to right turns</td></tr> </table>                                                                                                                                                                                                                                                                                                                                                                                                                         | checkbox |                  |     | 0 | aconflict_intersections__0 | No reason for traffic slowing | 1 | aconflict_intersections__1 | due to left turns                            | 2 | aconflict_intersections__2 | due to right turns            |    |                   |                              |    |                   |                          |    |              |                             |   |              |                           |    |               |                                |    |               |         |
| checkbox |                                                                                                                                                                                                                                                          |                                                                                                                                                                                                                                                                                                                          |                                                                                                                                                                                                                                                                                                                                                                                                                                                                                                                                                                                                                                                                                                                                                            |          |                  |     |   |                            |                               |   |                            |                                              |   |                            |                               |    |                   |                              |    |                   |                          |    |              |                             |   |              |                           |    |               |                                |    |               |         |
| 0        | aconflict_intersections__0                                                                                                                                                                                                                               | No reason for traffic slowing                                                                                                                                                                                                                                                                                            |                                                                                                                                                                                                                                                                                                                                                                                                                                                                                                                                                                                                                                                                                                                                                            |          |                  |     |   |                            |                               |   |                            |                                              |   |                            |                               |    |                   |                              |    |                   |                          |    |              |                             |   |              |                           |    |               |                                |    |               |         |
| 1        | aconflict_intersections__1                                                                                                                                                                                                                               | due to left turns                                                                                                                                                                                                                                                                                                        |                                                                                                                                                                                                                                                                                                                                                                                                                                                                                                                                                                                                                                                                                                                                                            |          |                  |     |   |                            |                               |   |                            |                                              |   |                            |                               |    |                   |                              |    |                   |                          |    |              |                             |   |              |                           |    |               |                                |    |               |         |
| 2        | aconflict_intersections__2                                                                                                                                                                                                                               | due to right turns                                                                                                                                                                                                                                                                                                       |                                                                                                                                                                                                                                                                                                                                                                                                                                                                                                                                                                                                                                                                                                                                                            |          |                  |     |   |                            |                               |   |                            |                                              |   |                            |                               |    |                   |                              |    |                   |                          |    |              |                             |   |              |                           |    |               |                                |    |               |         |

|    |                                                                                                                                                                                                                                                                                           |                                                                                                                                                                                       |                                                                                                                                                                                                                                                                                                                                                                                                                                                                                                                                                                                                                         |   |                             |                                      |     |                             |                                    |    |                             |                           |    |                              |                               |   |                  |                                          |   |                  |                          |    |                   |         |
|----|-------------------------------------------------------------------------------------------------------------------------------------------------------------------------------------------------------------------------------------------------------------------------------------------|---------------------------------------------------------------------------------------------------------------------------------------------------------------------------------------|-------------------------------------------------------------------------------------------------------------------------------------------------------------------------------------------------------------------------------------------------------------------------------------------------------------------------------------------------------------------------------------------------------------------------------------------------------------------------------------------------------------------------------------------------------------------------------------------------------------------------|---|-----------------------------|--------------------------------------|-----|-----------------------------|------------------------------------|----|-----------------------------|---------------------------|----|------------------------------|-------------------------------|---|------------------|------------------------------------------|---|------------------|--------------------------|----|-------------------|---------|
|    | nt] = '6' or [intersect_count] = '9<br>'9'                                                                                                                                                                                                                                                |                                                                                                                                                                                       | <table border="1"> <tr> <td>3</td> <td>aconflict_intersections___3</td> <td>due to pedestrians crossing the road</td> </tr> <tr> <td>4</td> <td>aconflict_intersections___4</td> <td>due to pedestrians on side of road</td> </tr> <tr> <td>5</td> <td>aconflict_intersections___5</td> <td>due to traffic merging in</td> </tr> <tr> <td>99</td> <td>aconflict_intersections___99</td> <td>Unknown</td> </tr> </table>                                                                                                                                                                                                 | 3 | aconflict_intersections___3 | due to pedestrians crossing the road | 4   | aconflict_intersections___4 | due to pedestrians on side of road | 5  | aconflict_intersections___5 | due to traffic merging in | 99 | aconflict_intersections___99 | Unknown                       |   |                  |                                          |   |                  |                          |    |                   |         |
| 3  | aconflict_intersections___3                                                                                                                                                                                                                                                               | due to pedestrians crossing the road                                                                                                                                                  |                                                                                                                                                                                                                                                                                                                                                                                                                                                                                                                                                                                                                         |   |                             |                                      |     |                             |                                    |    |                             |                           |    |                              |                               |   |                  |                                          |   |                  |                          |    |                   |         |
| 4  | aconflict_intersections___4                                                                                                                                                                                                                                                               | due to pedestrians on side of road                                                                                                                                                    |                                                                                                                                                                                                                                                                                                                                                                                                                                                                                                                                                                                                                         |   |                             |                                      |     |                             |                                    |    |                             |                           |    |                              |                               |   |                  |                                          |   |                  |                          |    |                   |         |
| 5  | aconflict_intersections___5                                                                                                                                                                                                                                                               | due to traffic merging in                                                                                                                                                             |                                                                                                                                                                                                                                                                                                                                                                                                                                                                                                                                                                                                                         |   |                             |                                      |     |                             |                                    |    |                             |                           |    |                              |                               |   |                  |                                          |   |                  |                          |    |                   |         |
| 99 | aconflict_intersections___99                                                                                                                                                                                                                                                              | Unknown                                                                                                                                                                               |                                                                                                                                                                                                                                                                                                                                                                                                                                                                                                                                                                                                                         |   |                             |                                      |     |                             |                                    |    |                             |                           |    |                              |                               |   |                  |                                          |   |                  |                          |    |                   |         |
| 15 | aroad_narrow<br>Show the field ONLY if: [intersections] = '0' or [intersect_count] = '1' or [intersect_count] = '2' or [intersect_count] = '3' or [intersect_count] = '4' or [intersect_count] = '5' or [intersect_count] = '6' or [intersect_count] = '9<br>'9'                          | Narrowing of Road a<br><i>Select all that apply</i>                                                                                                                                   | checkbox <table border="1"> <tr> <td>0</td> <td>aroad_narrow___0</td> <td>No narrowing</td> </tr> <tr> <td>1</td> <td>aroad_narrow___1</td> <td>Yes - due to erosion</td> </tr> <tr> <td>2</td> <td>aroad_narrow___2</td> <td>Yes - due to Landslides</td> </tr> <tr> <td>3</td> <td>aroad_narrow___3</td> <td>Yes - due to new construction</td> </tr> <tr> <td>4</td> <td>aroad_narrow___4</td> <td>Yes - due to pedestrians walking on road</td> </tr> <tr> <td>5</td> <td>aroad_narrow___5</td> <td>Yes - due to parked cars</td> </tr> <tr> <td>99</td> <td>aroad_narrow___99</td> <td>Unknown</td> </tr> </table> | 0 | aroad_narrow___0            | No narrowing                         | 1   | aroad_narrow___1            | Yes - due to erosion               | 2  | aroad_narrow___2            | Yes - due to Landslides   | 3  | aroad_narrow___3             | Yes - due to new construction | 4 | aroad_narrow___4 | Yes - due to pedestrians walking on road | 5 | aroad_narrow___5 | Yes - due to parked cars | 99 | aroad_narrow___99 | Unknown |
| 0  | aroad_narrow___0                                                                                                                                                                                                                                                                          | No narrowing                                                                                                                                                                          |                                                                                                                                                                                                                                                                                                                                                                                                                                                                                                                                                                                                                         |   |                             |                                      |     |                             |                                    |    |                             |                           |    |                              |                               |   |                  |                                          |   |                  |                          |    |                   |         |
| 1  | aroad_narrow___1                                                                                                                                                                                                                                                                          | Yes - due to erosion                                                                                                                                                                  |                                                                                                                                                                                                                                                                                                                                                                                                                                                                                                                                                                                                                         |   |                             |                                      |     |                             |                                    |    |                             |                           |    |                              |                               |   |                  |                                          |   |                  |                          |    |                   |         |
| 2  | aroad_narrow___2                                                                                                                                                                                                                                                                          | Yes - due to Landslides                                                                                                                                                               |                                                                                                                                                                                                                                                                                                                                                                                                                                                                                                                                                                                                                         |   |                             |                                      |     |                             |                                    |    |                             |                           |    |                              |                               |   |                  |                                          |   |                  |                          |    |                   |         |
| 3  | aroad_narrow___3                                                                                                                                                                                                                                                                          | Yes - due to new construction                                                                                                                                                         |                                                                                                                                                                                                                                                                                                                                                                                                                                                                                                                                                                                                                         |   |                             |                                      |     |                             |                                    |    |                             |                           |    |                              |                               |   |                  |                                          |   |                  |                          |    |                   |         |
| 4  | aroad_narrow___4                                                                                                                                                                                                                                                                          | Yes - due to pedestrians walking on road                                                                                                                                              |                                                                                                                                                                                                                                                                                                                                                                                                                                                                                                                                                                                                                         |   |                             |                                      |     |                             |                                    |    |                             |                           |    |                              |                               |   |                  |                                          |   |                  |                          |    |                   |         |
| 5  | aroad_narrow___5                                                                                                                                                                                                                                                                          | Yes - due to parked cars                                                                                                                                                              |                                                                                                                                                                                                                                                                                                                                                                                                                                                                                                                                                                                                                         |   |                             |                                      |     |                             |                                    |    |                             |                           |    |                              |                               |   |                  |                                          |   |                  |                          |    |                   |         |
| 99 | aroad_narrow___99                                                                                                                                                                                                                                                                         | Unknown                                                                                                                                                                               |                                                                                                                                                                                                                                                                                                                                                                                                                                                                                                                                                                                                                         |   |                             |                                      |     |                             |                                    |    |                             |                           |    |                              |                               |   |                  |                                          |   |                  |                          |    |                   |         |
| 16 | aroadside<br>Show the field ONLY if: [intersections] = '0' or [intersect_count] = '1' or [intersect_count] = '2' or [intersect_count] = '3' or [intersect_count] = '4' or [intersect_count] = '5' or [intersect_count] = '6' or [intersect_count] = '9<br>'9'                             | Presence of Roadside (shoulder) on a<br><i>Not a true lane of traffic but some extra space along the side of the road</i>                                                             | radio <table border="1"> <tr> <td>0</td> <td>No</td> </tr> <tr> <td>1</td> <td>Yes</td> </tr> <tr> <td>99</td> <td>Unknown</td> </tr> </table>                                                                                                                                                                                                                                                                                                                                                                                                                                                                          | 0 | No                          | 1                                    | Yes | 99                          | Unknown                            |    |                             |                           |    |                              |                               |   |                  |                                          |   |                  |                          |    |                   |         |
| 0  | No                                                                                                                                                                                                                                                                                        |                                                                                                                                                                                       |                                                                                                                                                                                                                                                                                                                                                                                                                                                                                                                                                                                                                         |   |                             |                                      |     |                             |                                    |    |                             |                           |    |                              |                               |   |                  |                                          |   |                  |                          |    |                   |         |
| 1  | Yes                                                                                                                                                                                                                                                                                       |                                                                                                                                                                                       |                                                                                                                                                                                                                                                                                                                                                                                                                                                                                                                                                                                                                         |   |                             |                                      |     |                             |                                    |    |                             |                           |    |                              |                               |   |                  |                                          |   |                  |                          |    |                   |         |
| 99 | Unknown                                                                                                                                                                                                                                                                                   |                                                                                                                                                                                       |                                                                                                                                                                                                                                                                                                                                                                                                                                                                                                                                                                                                                         |   |                             |                                      |     |                             |                                    |    |                             |                           |    |                              |                               |   |                  |                                          |   |                  |                          |    |                   |         |
| 17 | aunevenness_roadside<br>Show the field ONLY if: [intersections] = '0' or [aroadside] = '1' and [intersect_count] = '1' or [intersect_count] = '2' or [intersect_count] = '3' or [intersect_count] = '4' or [intersect_count] = '5' or [intersect_count] = '6' or [intersect_count] = '99' | Unevenness of roadside (shoulder) on a<br><i>Choose yes if you think that the shoulder has a slope to it causing it to be uneven, or if it appears there are many dips and hills.</i> | radio <table border="1"> <tr> <td>0</td> <td>No</td> </tr> <tr> <td>1</td> <td>Yes</td> </tr> <tr> <td>2</td> <td>Not applicable</td> </tr> <tr> <td>99</td> <td>Unknown</td> </tr> </table>                                                                                                                                                                                                                                                                                                                                                                                                                            | 0 | No                          | 1                                    | Yes | 2                           | Not applicable                     | 99 | Unknown                     |                           |    |                              |                               |   |                  |                                          |   |                  |                          |    |                   |         |
| 0  | No                                                                                                                                                                                                                                                                                        |                                                                                                                                                                                       |                                                                                                                                                                                                                                                                                                                                                                                                                                                                                                                                                                                                                         |   |                             |                                      |     |                             |                                    |    |                             |                           |    |                              |                               |   |                  |                                          |   |                  |                          |    |                   |         |
| 1  | Yes                                                                                                                                                                                                                                                                                       |                                                                                                                                                                                       |                                                                                                                                                                                                                                                                                                                                                                                                                                                                                                                                                                                                                         |   |                             |                                      |     |                             |                                    |    |                             |                           |    |                              |                               |   |                  |                                          |   |                  |                          |    |                   |         |
| 2  | Not applicable                                                                                                                                                                                                                                                                            |                                                                                                                                                                                       |                                                                                                                                                                                                                                                                                                                                                                                                                                                                                                                                                                                                                         |   |                             |                                      |     |                             |                                    |    |                             |                           |    |                              |                               |   |                  |                                          |   |                  |                          |    |                   |         |
| 99 | Unknown                                                                                                                                                                                                                                                                                   |                                                                                                                                                                                       |                                                                                                                                                                                                                                                                                                                                                                                                                                                                                                                                                                                                                         |   |                             |                                      |     |                             |                                    |    |                             |                           |    |                              |                               |   |                  |                                          |   |                  |                          |    |                   |         |
| 18 | aunevenness_medians<br>Show the field ONLY if: [inters                                                                                                                                                                                                                                    | Unevenness of median of a divided road a<br><i>An example, the median of grass and trees on the road from town to</i>                                                                 | radio <table border="1"> <tr> <td></td> <td></td> </tr> </table>                                                                                                                                                                                                                                                                                                                                                                                                                                                                                                                                                        |   |                             |                                      |     |                             |                                    |    |                             |                           |    |                              |                               |   |                  |                                          |   |                  |                          |    |                   |         |
|    |                                                                                                                                                                                                                                                                                           |                                                                                                                                                                                       |                                                                                                                                                                                                                                                                                                                                                                                                                                                                                                                                                                                                                         |   |                             |                                      |     |                             |                                    |    |                             |                           |    |                              |                               |   |                  |                                          |   |                  |                          |    |                   |         |

|    |                                                                                                                                                                                                                                                                                         |                                                                                                                                                                                                                                                                                         |                                                                                                                                                                            |   |    |   |     |    |                |    |         |
|----|-----------------------------------------------------------------------------------------------------------------------------------------------------------------------------------------------------------------------------------------------------------------------------------------|-----------------------------------------------------------------------------------------------------------------------------------------------------------------------------------------------------------------------------------------------------------------------------------------|----------------------------------------------------------------------------------------------------------------------------------------------------------------------------|---|----|---|-----|----|----------------|----|---------|
|    | <p>ections] = '0' or [alane_type] = '2' or [alane_type] = '3' or [alane_type] = '99' and [intersect_count] = '1' or [intersect_count] = '2' or [intersect_count] = '3' or [intersect_count] = '4' or [intersect_count] = '5' or [intersect_count] = '6' or [intersect_count] = '99'</p> | <p><i>CHUK is NOT uneven, look for sloping or holes again</i></p>                                                                                                                                                                                                                       | <table border="1"> <tr><td>0</td><td>No</td></tr> <tr><td>1</td><td>Yes</td></tr> <tr><td>2</td><td>Not applicable</td></tr> <tr><td>99</td><td>Unknown</td></tr> </table> | 0 | No | 1 | Yes | 2  | Not applicable | 99 | Unknown |
| 0  | No                                                                                                                                                                                                                                                                                      |                                                                                                                                                                                                                                                                                         |                                                                                                                                                                            |   |    |   |     |    |                |    |         |
| 1  | Yes                                                                                                                                                                                                                                                                                     |                                                                                                                                                                                                                                                                                         |                                                                                                                                                                            |   |    |   |     |    |                |    |         |
| 2  | Not applicable                                                                                                                                                                                                                                                                          |                                                                                                                                                                                                                                                                                         |                                                                                                                                                                            |   |    |   |     |    |                |    |         |
| 99 | Unknown                                                                                                                                                                                                                                                                                 |                                                                                                                                                                                                                                                                                         |                                                                                                                                                                            |   |    |   |     |    |                |    |         |
| 19 | <p>awalkways<br/>Show the field ONLY if: [intersections] = '0' or [intersect_count] = '1' or [intersect_count] = '2' or [intersect_count] = '3' or [intersect_count] = '4' or [intersect_count] = '5' or [intersect_count] = '6' or [intersect_count] = '99'</p>                        | <p>Presence of sidewalks on road a<br/><i>Dedicated pedestrian only areas to walk that are separate from the road, like on both sides of the road from CHUK to town</i></p>                                                                                                             | <p>radio</p> <table border="1"> <tr><td>0</td><td>No</td></tr> <tr><td>1</td><td>Yes</td></tr> <tr><td>99</td><td>Unknown</td></tr> </table>                               | 0 | No | 1 | Yes | 99 | Unknown        |    |         |
| 0  | No                                                                                                                                                                                                                                                                                      |                                                                                                                                                                                                                                                                                         |                                                                                                                                                                            |   |    |   |     |    |                |    |         |
| 1  | Yes                                                                                                                                                                                                                                                                                     |                                                                                                                                                                                                                                                                                         |                                                                                                                                                                            |   |    |   |     |    |                |    |         |
| 99 | Unknown                                                                                                                                                                                                                                                                                 |                                                                                                                                                                                                                                                                                         |                                                                                                                                                                            |   |    |   |     |    |                |    |         |
| 20 | <p>ainformal_walkways<br/>Show the field ONLY if: [intersections] = '0' or [intersect_count] = '1' or [intersect_count] = '2' or [intersect_count] = '3' or [intersect_count] = '4' or [intersect_count] = '5' or [intersect_count] = '6' or [intersect_count] = '99'</p>               | <p>Presence of informal pedestrian walkways on road a<br/><i>Do you see many pedestrians walking on the side of the road? An example is near the construction just past BK walking from BK towards the UTC - there is no sidewalk but many people walk in that area of the road</i></p> | <p>radio</p> <table border="1"> <tr><td>0</td><td>No</td></tr> <tr><td>1</td><td>Yes</td></tr> <tr><td>99</td><td>Unknown</td></tr> </table>                               | 0 | No | 1 | Yes | 99 | Unknown        |    |         |
| 0  | No                                                                                                                                                                                                                                                                                      |                                                                                                                                                                                                                                                                                         |                                                                                                                                                                            |   |    |   |     |    |                |    |         |
| 1  | Yes                                                                                                                                                                                                                                                                                     |                                                                                                                                                                                                                                                                                         |                                                                                                                                                                            |   |    |   |     |    |                |    |         |
| 99 | Unknown                                                                                                                                                                                                                                                                                 |                                                                                                                                                                                                                                                                                         |                                                                                                                                                                            |   |    |   |     |    |                |    |         |
| 21 | <p>aunderpasses<br/>Show the field ONLY if: [intersections] = '0' or [intersect_count] = '1' or [intersect_count] = '2' or [intersect_count] = '3' or [intersect_count] = '4' or [intersect_count] = '5' or [intersect_count] = '6' or [intersect_count] = '99'</p>                     | <p>Presence of a vehicle underpass on road a<br/><i>An example, Poids Lourds passes under the road going to Kimicanga near kwa rasta</i></p>                                                                                                                                            | <p>radio</p> <table border="1"> <tr><td>0</td><td>No</td></tr> <tr><td>1</td><td>Yes</td></tr> <tr><td>99</td><td>Unknown</td></tr> </table>                               | 0 | No | 1 | Yes | 99 | Unknown        |    |         |
| 0  | No                                                                                                                                                                                                                                                                                      |                                                                                                                                                                                                                                                                                         |                                                                                                                                                                            |   |    |   |     |    |                |    |         |
| 1  | Yes                                                                                                                                                                                                                                                                                     |                                                                                                                                                                                                                                                                                         |                                                                                                                                                                            |   |    |   |     |    |                |    |         |
| 99 | Unknown                                                                                                                                                                                                                                                                                 |                                                                                                                                                                                                                                                                                         |                                                                                                                                                                            |   |    |   |     |    |                |    |         |
| 22 | <p>abus_stop<br/>Show the field ONLY if: [intersections] = '0' or [intersect_count] = '1' or [intersect_count] = '2' or [intersect_count] = '3' or [intersect_count] = '4' or [intersect_count] = '5' or [intersect_count] = '6' or [intersect_count] = '99'</p>                        | <p>Presence of Bus Stop on road a</p>                                                                                                                                                                                                                                                   | <p>radio</p> <table border="1"> <tr><td>0</td><td>No</td></tr> <tr><td>1</td><td>Yes</td></tr> <tr><td>99</td><td>Unknown</td></tr> </table>                               | 0 | No | 1 | Yes | 99 | Unknown        |    |         |
| 0  | No                                                                                                                                                                                                                                                                                      |                                                                                                                                                                                                                                                                                         |                                                                                                                                                                            |   |    |   |     |    |                |    |         |
| 1  | Yes                                                                                                                                                                                                                                                                                     |                                                                                                                                                                                                                                                                                         |                                                                                                                                                                            |   |    |   |     |    |                |    |         |
| 99 | Unknown                                                                                                                                                                                                                                                                                 |                                                                                                                                                                                                                                                                                         |                                                                                                                                                                            |   |    |   |     |    |                |    |         |

|    |                                                                                                                                                                                                                                                                                                           |                                                                                                                               |                                                                                                                                                                                                                                                                                                                                                                                                                                                                                                                                                                                                                                                                                                              |   |                           |                   |                 |                           |                        |   |                           |                         |                |                           |                        |    |                           |                         |   |                           |                |    |                            |       |    |                            |         |
|----|-----------------------------------------------------------------------------------------------------------------------------------------------------------------------------------------------------------------------------------------------------------------------------------------------------------|-------------------------------------------------------------------------------------------------------------------------------|--------------------------------------------------------------------------------------------------------------------------------------------------------------------------------------------------------------------------------------------------------------------------------------------------------------------------------------------------------------------------------------------------------------------------------------------------------------------------------------------------------------------------------------------------------------------------------------------------------------------------------------------------------------------------------------------------------------|---|---------------------------|-------------------|-----------------|---------------------------|------------------------|---|---------------------------|-------------------------|----------------|---------------------------|------------------------|----|---------------------------|-------------------------|---|---------------------------|----------------|----|----------------------------|-------|----|----------------------------|---------|
| 23 | <p>abump<br/>Show the field ONLY if: [intersections] = '0' or [intersect_count] = '1' or [intersect_count] = '2' or [intersect_count] = '3' or [intersect_count] = '4' or [intersect_count] = '5' or [intersect_count] = '6' or [intersect_count] = '99'</p>                                              | Presence of a hump on road a                                                                                                  | <p>radio</p> <table border="1"> <tr><td>0</td><td>No</td></tr> <tr><td>1</td><td>Yes</td></tr> <tr><td>99</td><td>Unknown</td></tr> </table>                                                                                                                                                                                                                                                                                                                                                                                                                                                                                                                                                                 | 0 | No                        | 1                 | Yes             | 99                        | Unknown                |   |                           |                         |                |                           |                        |    |                           |                         |   |                           |                |    |                            |       |    |                            |         |
| 0  | No                                                                                                                                                                                                                                                                                                        |                                                                                                                               |                                                                                                                                                                                                                                                                                                                                                                                                                                                                                                                                                                                                                                                                                                              |   |                           |                   |                 |                           |                        |   |                           |                         |                |                           |                        |    |                           |                         |   |                           |                |    |                            |       |    |                            |         |
| 1  | Yes                                                                                                                                                                                                                                                                                                       |                                                                                                                               |                                                                                                                                                                                                                                                                                                                                                                                                                                                                                                                                                                                                                                                                                                              |   |                           |                   |                 |                           |                        |   |                           |                         |                |                           |                        |    |                           |                         |   |                           |                |    |                            |       |    |                            |         |
| 99 | Unknown                                                                                                                                                                                                                                                                                                   |                                                                                                                               |                                                                                                                                                                                                                                                                                                                                                                                                                                                                                                                                                                                                                                                                                                              |   |                           |                   |                 |                           |                        |   |                           |                         |                |                           |                        |    |                           |                         |   |                           |                |    |                            |       |    |                            |         |
| 24 | <p>abump_type<br/>Show the field ONLY if: [intersections] = '0' or [abump] = '1' and [intersect_count] = '1' or [intersect_count] = '2' or [intersect_count] = '3' or [intersect_count] = '4' or [intersect_count] = '5' or [intersect_count] = '6' or [intersect_count] = '99'</p>                       | Type of hump on road a                                                                                                        | <p>radio</p> <table border="1"> <tr><td>0</td><td>low and curved</td></tr> <tr><td>1</td><td>high and curved</td></tr> <tr><td>2</td><td>rumble strips</td></tr> <tr><td>3</td><td>trapezoidal</td></tr> <tr><td>4</td><td>Not applicable</td></tr> <tr><td>90</td><td>other</td></tr> <tr><td>99</td><td>Unknown</td></tr> </table>                                                                                                                                                                                                                                                                                                                                                                         | 0 | low and curved            | 1                 | high and curved | 2                         | rumble strips          | 3 | trapezoidal               | 4                       | Not applicable | 90                        | other                  | 99 | Unknown                   |                         |   |                           |                |    |                            |       |    |                            |         |
| 0  | low and curved                                                                                                                                                                                                                                                                                            |                                                                                                                               |                                                                                                                                                                                                                                                                                                                                                                                                                                                                                                                                                                                                                                                                                                              |   |                           |                   |                 |                           |                        |   |                           |                         |                |                           |                        |    |                           |                         |   |                           |                |    |                            |       |    |                            |         |
| 1  | high and curved                                                                                                                                                                                                                                                                                           |                                                                                                                               |                                                                                                                                                                                                                                                                                                                                                                                                                                                                                                                                                                                                                                                                                                              |   |                           |                   |                 |                           |                        |   |                           |                         |                |                           |                        |    |                           |                         |   |                           |                |    |                            |       |    |                            |         |
| 2  | rumble strips                                                                                                                                                                                                                                                                                             |                                                                                                                               |                                                                                                                                                                                                                                                                                                                                                                                                                                                                                                                                                                                                                                                                                                              |   |                           |                   |                 |                           |                        |   |                           |                         |                |                           |                        |    |                           |                         |   |                           |                |    |                            |       |    |                            |         |
| 3  | trapezoidal                                                                                                                                                                                                                                                                                               |                                                                                                                               |                                                                                                                                                                                                                                                                                                                                                                                                                                                                                                                                                                                                                                                                                                              |   |                           |                   |                 |                           |                        |   |                           |                         |                |                           |                        |    |                           |                         |   |                           |                |    |                            |       |    |                            |         |
| 4  | Not applicable                                                                                                                                                                                                                                                                                            |                                                                                                                               |                                                                                                                                                                                                                                                                                                                                                                                                                                                                                                                                                                                                                                                                                                              |   |                           |                   |                 |                           |                        |   |                           |                         |                |                           |                        |    |                           |                         |   |                           |                |    |                            |       |    |                            |         |
| 90 | other                                                                                                                                                                                                                                                                                                     |                                                                                                                               |                                                                                                                                                                                                                                                                                                                                                                                                                                                                                                                                                                                                                                                                                                              |   |                           |                   |                 |                           |                        |   |                           |                         |                |                           |                        |    |                           |                         |   |                           |                |    |                            |       |    |                            |         |
| 99 | Unknown                                                                                                                                                                                                                                                                                                   |                                                                                                                               |                                                                                                                                                                                                                                                                                                                                                                                                                                                                                                                                                                                                                                                                                                              |   |                           |                   |                 |                           |                        |   |                           |                         |                |                           |                        |    |                           |                         |   |                           |                |    |                            |       |    |                            |         |
| 25 | <p>attraffic_light<br/>Show the field ONLY if: [intersections] = '0' or [intersect_count] = '1' or [intersect_count] = '2' or [intersect_count] = '3' or [intersect_count] = '4' or [intersect_count] = '5' or [intersect_count] = '6' or [intersect_count] = '99'</p>                                    | Presence of traffic light on road a                                                                                           | <p>radio</p> <table border="1"> <tr><td>0</td><td>No</td></tr> <tr><td>1</td><td>Yes</td></tr> <tr><td>99</td><td>Unknown</td></tr> </table>                                                                                                                                                                                                                                                                                                                                                                                                                                                                                                                                                                 | 0 | No                        | 1                 | Yes             | 99                        | Unknown                |   |                           |                         |                |                           |                        |    |                           |                         |   |                           |                |    |                            |       |    |                            |         |
| 0  | No                                                                                                                                                                                                                                                                                                        |                                                                                                                               |                                                                                                                                                                                                                                                                                                                                                                                                                                                                                                                                                                                                                                                                                                              |   |                           |                   |                 |                           |                        |   |                           |                         |                |                           |                        |    |                           |                         |   |                           |                |    |                            |       |    |                            |         |
| 1  | Yes                                                                                                                                                                                                                                                                                                       |                                                                                                                               |                                                                                                                                                                                                                                                                                                                                                                                                                                                                                                                                                                                                                                                                                                              |   |                           |                   |                 |                           |                        |   |                           |                         |                |                           |                        |    |                           |                         |   |                           |                |    |                            |       |    |                            |         |
| 99 | Unknown                                                                                                                                                                                                                                                                                                   |                                                                                                                               |                                                                                                                                                                                                                                                                                                                                                                                                                                                                                                                                                                                                                                                                                                              |   |                           |                   |                 |                           |                        |   |                           |                         |                |                           |                        |    |                           |                         |   |                           |                |    |                            |       |    |                            |         |
| 26 | <p>attraffic_light_extras<br/>Show the field ONLY if: [intersections] = '0' or [attraffic_light] = '1' and [intersect_count] = '1' or [intersect_count] = '2' or [intersect_count] = '3' or [intersect_count] = '4' or [intersect_count] = '5' or [intersect_count] = '6' or [intersect_count] = '99'</p> | <p>Presence of traffic light features on road a<br/><i>Some lights show the number of seconds until the light changes</i></p> | <p>checkbox</p> <table border="1"> <tr><td>0</td><td>attraffic_light_extras__0</td><td>No - simple light</td></tr> <tr><td>1</td><td>attraffic_light_extras__1</td><td>Yes - countdown timers</td></tr> <tr><td>2</td><td>attraffic_light_extras__2</td><td>Yes - pedestrian signal</td></tr> <tr><td>3</td><td>attraffic_light_extras__3</td><td>Yes - left turn signal</td></tr> <tr><td>4</td><td>attraffic_light_extras__4</td><td>Yes - right turn signal</td></tr> <tr><td>5</td><td>attraffic_light_extras__5</td><td>Not applicable</td></tr> <tr><td>90</td><td>attraffic_light_extras__90</td><td>other</td></tr> <tr><td>99</td><td>attraffic_light_extras__99</td><td>Unknown</td></tr> </table> | 0 | attraffic_light_extras__0 | No - simple light | 1               | attraffic_light_extras__1 | Yes - countdown timers | 2 | attraffic_light_extras__2 | Yes - pedestrian signal | 3              | attraffic_light_extras__3 | Yes - left turn signal | 4  | attraffic_light_extras__4 | Yes - right turn signal | 5 | attraffic_light_extras__5 | Not applicable | 90 | attraffic_light_extras__90 | other | 99 | attraffic_light_extras__99 | Unknown |
| 0  | attraffic_light_extras__0                                                                                                                                                                                                                                                                                 | No - simple light                                                                                                             |                                                                                                                                                                                                                                                                                                                                                                                                                                                                                                                                                                                                                                                                                                              |   |                           |                   |                 |                           |                        |   |                           |                         |                |                           |                        |    |                           |                         |   |                           |                |    |                            |       |    |                            |         |
| 1  | attraffic_light_extras__1                                                                                                                                                                                                                                                                                 | Yes - countdown timers                                                                                                        |                                                                                                                                                                                                                                                                                                                                                                                                                                                                                                                                                                                                                                                                                                              |   |                           |                   |                 |                           |                        |   |                           |                         |                |                           |                        |    |                           |                         |   |                           |                |    |                            |       |    |                            |         |
| 2  | attraffic_light_extras__2                                                                                                                                                                                                                                                                                 | Yes - pedestrian signal                                                                                                       |                                                                                                                                                                                                                                                                                                                                                                                                                                                                                                                                                                                                                                                                                                              |   |                           |                   |                 |                           |                        |   |                           |                         |                |                           |                        |    |                           |                         |   |                           |                |    |                            |       |    |                            |         |
| 3  | attraffic_light_extras__3                                                                                                                                                                                                                                                                                 | Yes - left turn signal                                                                                                        |                                                                                                                                                                                                                                                                                                                                                                                                                                                                                                                                                                                                                                                                                                              |   |                           |                   |                 |                           |                        |   |                           |                         |                |                           |                        |    |                           |                         |   |                           |                |    |                            |       |    |                            |         |
| 4  | attraffic_light_extras__4                                                                                                                                                                                                                                                                                 | Yes - right turn signal                                                                                                       |                                                                                                                                                                                                                                                                                                                                                                                                                                                                                                                                                                                                                                                                                                              |   |                           |                   |                 |                           |                        |   |                           |                         |                |                           |                        |    |                           |                         |   |                           |                |    |                            |       |    |                            |         |
| 5  | attraffic_light_extras__5                                                                                                                                                                                                                                                                                 | Not applicable                                                                                                                |                                                                                                                                                                                                                                                                                                                                                                                                                                                                                                                                                                                                                                                                                                              |   |                           |                   |                 |                           |                        |   |                           |                         |                |                           |                        |    |                           |                         |   |                           |                |    |                            |       |    |                            |         |
| 90 | attraffic_light_extras__90                                                                                                                                                                                                                                                                                | other                                                                                                                         |                                                                                                                                                                                                                                                                                                                                                                                                                                                                                                                                                                                                                                                                                                              |   |                           |                   |                 |                           |                        |   |                           |                         |                |                           |                        |    |                           |                         |   |                           |                |    |                            |       |    |                            |         |
| 99 | attraffic_light_extras__99                                                                                                                                                                                                                                                                                | Unknown                                                                                                                       |                                                                                                                                                                                                                                                                                                                                                                                                                                                                                                                                                                                                                                                                                                              |   |                           |                   |                 |                           |                        |   |                           |                         |                |                           |                        |    |                           |                         |   |                           |                |    |                            |       |    |                            |         |

|    |                                                                                                                                                                                                                                                                                                      |                                              |                                                                                                                                                                                                                                                                                                                                                                                                                                                                                         |   |                        |           |                                   |                        |                          |   |                                                |                           |                        |                         |                |    |         |    |         |
|----|------------------------------------------------------------------------------------------------------------------------------------------------------------------------------------------------------------------------------------------------------------------------------------------------------|----------------------------------------------|-----------------------------------------------------------------------------------------------------------------------------------------------------------------------------------------------------------------------------------------------------------------------------------------------------------------------------------------------------------------------------------------------------------------------------------------------------------------------------------------|---|------------------------|-----------|-----------------------------------|------------------------|--------------------------|---|------------------------------------------------|---------------------------|------------------------|-------------------------|----------------|----|---------|----|---------|
| 27 | <p>aroad_signs_traffic<br/>Show the field ONLY if: [intersections] = '0' or [intersect_count] = '1' or [intersect_count] = '2' or [intersect_count] = '3' or [intersect_count] = '4' or [intersect_count] = '5' or [intersect_count] = '6' or [intersect_count] = '9' or '9'</p>                     | Existence of traffic signs on road a         | <p>checkbox</p> <table border="1"> <tr> <td>0</td> <td>aroad_signs_traffic__0</td> <td>No</td> </tr> <tr> <td>1</td> <td>aroad_signs_traffic__1</td> <td>Yes - Stop Signs</td> </tr> <tr> <td>2</td> <td>aroad_signs_traffic__2</td> <td>Yes - other traffic signs</td> </tr> <tr> <td>99</td> <td>aroad_signs_traffic__99</td> <td>Unknown</td> </tr> </table>                                                                                                                         | 0 | aroad_signs_traffic__0 | No        | 1                                 | aroad_signs_traffic__1 | Yes - Stop Signs         | 2 | aroad_signs_traffic__2                         | Yes - other traffic signs | 99                     | aroad_signs_traffic__99 | Unknown        |    |         |    |         |
| 0  | aroad_signs_traffic__0                                                                                                                                                                                                                                                                               | No                                           |                                                                                                                                                                                                                                                                                                                                                                                                                                                                                         |   |                        |           |                                   |                        |                          |   |                                                |                           |                        |                         |                |    |         |    |         |
| 1  | aroad_signs_traffic__1                                                                                                                                                                                                                                                                               | Yes - Stop Signs                             |                                                                                                                                                                                                                                                                                                                                                                                                                                                                                         |   |                        |           |                                   |                        |                          |   |                                                |                           |                        |                         |                |    |         |    |         |
| 2  | aroad_signs_traffic__2                                                                                                                                                                                                                                                                               | Yes - other traffic signs                    |                                                                                                                                                                                                                                                                                                                                                                                                                                                                                         |   |                        |           |                                   |                        |                          |   |                                                |                           |                        |                         |                |    |         |    |         |
| 99 | aroad_signs_traffic__99                                                                                                                                                                                                                                                                              | Unknown                                      |                                                                                                                                                                                                                                                                                                                                                                                                                                                                                         |   |                        |           |                                   |                        |                          |   |                                                |                           |                        |                         |                |    |         |    |         |
| 28 | <p>aspeed_limit<br/>Show the field ONLY if: [intersections] = '0' or [intersect_count] = '1' or [intersect_count] = '2' or [intersect_count] = '3' or [intersect_count] = '4' or [intersect_count] = '5' or [intersect_count] = '6' or [intersect_count] = '9' or '9'</p>                            | Signs showing speed limit for cars on road a | <p>dropdown</p> <table border="1"> <tr> <td>0</td> <td>No speed limit posted</td> </tr> <tr> <td>1</td> <td>&lt; =40 kmph</td> </tr> <tr> <td>2</td> <td>between 40-60 kmph</td> </tr> <tr> <td>3</td> <td>61-80kmph</td> </tr> <tr> <td>4</td> <td>80-110 kmph</td> </tr> <tr> <td>5</td> <td>&gt;110 kmph</td> </tr> <tr> <td>99</td> <td>Unknown</td> </tr> </table>                                                                                                                 | 0 | No speed limit posted  | 1         | < =40 kmph                        | 2                      | between 40-60 kmph       | 3 | 61-80kmph                                      | 4                         | 80-110 kmph            | 5                       | >110 kmph      | 99 | Unknown |    |         |
| 0  | No speed limit posted                                                                                                                                                                                                                                                                                |                                              |                                                                                                                                                                                                                                                                                                                                                                                                                                                                                         |   |                        |           |                                   |                        |                          |   |                                                |                           |                        |                         |                |    |         |    |         |
| 1  | < =40 kmph                                                                                                                                                                                                                                                                                           |                                              |                                                                                                                                                                                                                                                                                                                                                                                                                                                                                         |   |                        |           |                                   |                        |                          |   |                                                |                           |                        |                         |                |    |         |    |         |
| 2  | between 40-60 kmph                                                                                                                                                                                                                                                                                   |                                              |                                                                                                                                                                                                                                                                                                                                                                                                                                                                                         |   |                        |           |                                   |                        |                          |   |                                                |                           |                        |                         |                |    |         |    |         |
| 3  | 61-80kmph                                                                                                                                                                                                                                                                                            |                                              |                                                                                                                                                                                                                                                                                                                                                                                                                                                                                         |   |                        |           |                                   |                        |                          |   |                                                |                           |                        |                         |                |    |         |    |         |
| 4  | 80-110 kmph                                                                                                                                                                                                                                                                                          |                                              |                                                                                                                                                                                                                                                                                                                                                                                                                                                                                         |   |                        |           |                                   |                        |                          |   |                                                |                           |                        |                         |                |    |         |    |         |
| 5  | >110 kmph                                                                                                                                                                                                                                                                                            |                                              |                                                                                                                                                                                                                                                                                                                                                                                                                                                                                         |   |                        |           |                                   |                        |                          |   |                                                |                           |                        |                         |                |    |         |    |         |
| 99 | Unknown                                                                                                                                                                                                                                                                                              |                                              |                                                                                                                                                                                                                                                                                                                                                                                                                                                                                         |   |                        |           |                                   |                        |                          |   |                                                |                           |                        |                         |                |    |         |    |         |
| 29 | <p>acurves_type<br/>Show the field ONLY if: [intersections] = '0' or [intersect_count] = '1' or [intersect_count] = '2' or [intersect_count] = '3' or [intersect_count] = '4' or [intersect_count] = '5' or [intersect_count] = '6' or [intersect_count] = '9' or '9'</p>                            | Types of curve on road a                     | <p>checkbox</p> <table border="1"> <tr> <td>0</td> <td>acurves_type__0</td> <td>No curves</td> </tr> <tr> <td>1</td> <td>acurves_type__1</td> <td>Horizontal</td> </tr> <tr> <td>2</td> <td>acurves_type__2</td> <td>Vertical - hill</td> </tr> <tr> <td>99</td> <td>acurves_type__99</td> <td>Unknown</td> </tr> </table>                                                                                                                                                              | 0 | acurves_type__0        | No curves | 1                                 | acurves_type__1        | Horizontal               | 2 | acurves_type__2                                | Vertical - hill           | 99                     | acurves_type__99        | Unknown        |    |         |    |         |
| 0  | acurves_type__0                                                                                                                                                                                                                                                                                      | No curves                                    |                                                                                                                                                                                                                                                                                                                                                                                                                                                                                         |   |                        |           |                                   |                        |                          |   |                                                |                           |                        |                         |                |    |         |    |         |
| 1  | acurves_type__1                                                                                                                                                                                                                                                                                      | Horizontal                                   |                                                                                                                                                                                                                                                                                                                                                                                                                                                                                         |   |                        |           |                                   |                        |                          |   |                                                |                           |                        |                         |                |    |         |    |         |
| 2  | acurves_type__2                                                                                                                                                                                                                                                                                      | Vertical - hill                              |                                                                                                                                                                                                                                                                                                                                                                                                                                                                                         |   |                        |           |                                   |                        |                          |   |                                                |                           |                        |                         |                |    |         |    |         |
| 99 | acurves_type__99                                                                                                                                                                                                                                                                                     | Unknown                                      |                                                                                                                                                                                                                                                                                                                                                                                                                                                                                         |   |                        |           |                                   |                        |                          |   |                                                |                           |                        |                         |                |    |         |    |         |
| 30 | <p>ahorizontal_curve<br/>Show the field ONLY if: [intersections] = '0' or [acurves_type(1)] = '1' and [intersect_count] = '1' or [intersect_count] = '2' or [intersect_count] = '3' or [intersect_count] = '4' or [intersect_count] = '5' or [intersect_count] = '6' or [intersect_count] = '99'</p> | Types of Horizontal Curve on road a          | <p>radio</p> <table border="1"> <tr> <td>0</td> <td>Simple curve - 1 bend</td> </tr> <tr> <td>1</td> <td>Compound curve - 2 bends, S curve</td> </tr> <tr> <td>2</td> <td>circle curve - rondpoint</td> </tr> <tr> <td>3</td> <td>sharp simple curve - less then 90 degree angle</td> </tr> <tr> <td>4</td> <td>reverse curve - U turn</td> </tr> <tr> <td>5</td> <td>Not applicable</td> </tr> <tr> <td>90</td> <td>Others</td> </tr> <tr> <td>99</td> <td>Unknown</td> </tr> </table> | 0 | Simple curve - 1 bend  | 1         | Compound curve - 2 bends, S curve | 2                      | circle curve - rondpoint | 3 | sharp simple curve - less then 90 degree angle | 4                         | reverse curve - U turn | 5                       | Not applicable | 90 | Others  | 99 | Unknown |
| 0  | Simple curve - 1 bend                                                                                                                                                                                                                                                                                |                                              |                                                                                                                                                                                                                                                                                                                                                                                                                                                                                         |   |                        |           |                                   |                        |                          |   |                                                |                           |                        |                         |                |    |         |    |         |
| 1  | Compound curve - 2 bends, S curve                                                                                                                                                                                                                                                                    |                                              |                                                                                                                                                                                                                                                                                                                                                                                                                                                                                         |   |                        |           |                                   |                        |                          |   |                                                |                           |                        |                         |                |    |         |    |         |
| 2  | circle curve - rondpoint                                                                                                                                                                                                                                                                             |                                              |                                                                                                                                                                                                                                                                                                                                                                                                                                                                                         |   |                        |           |                                   |                        |                          |   |                                                |                           |                        |                         |                |    |         |    |         |
| 3  | sharp simple curve - less then 90 degree angle                                                                                                                                                                                                                                                       |                                              |                                                                                                                                                                                                                                                                                                                                                                                                                                                                                         |   |                        |           |                                   |                        |                          |   |                                                |                           |                        |                         |                |    |         |    |         |
| 4  | reverse curve - U turn                                                                                                                                                                                                                                                                               |                                              |                                                                                                                                                                                                                                                                                                                                                                                                                                                                                         |   |                        |           |                                   |                        |                          |   |                                                |                           |                        |                         |                |    |         |    |         |
| 5  | Not applicable                                                                                                                                                                                                                                                                                       |                                              |                                                                                                                                                                                                                                                                                                                                                                                                                                                                                         |   |                        |           |                                   |                        |                          |   |                                                |                           |                        |                         |                |    |         |    |         |
| 90 | Others                                                                                                                                                                                                                                                                                               |                                              |                                                                                                                                                                                                                                                                                                                                                                                                                                                                                         |   |                        |           |                                   |                        |                          |   |                                                |                           |                        |                         |                |    |         |    |         |
| 99 | Unknown                                                                                                                                                                                                                                                                                              |                                              |                                                                                                                                                                                                                                                                                                                                                                                                                                                                                         |   |                        |           |                                   |                        |                          |   |                                                |                           |                        |                         |                |    |         |    |         |
| 31 | avertical_curve                                                                                                                                                                                                                                                                                      | Types of Vertical Curve on road a            | radio                                                                                                                                                                                                                                                                                                                                                                                                                                                                                   |   |                        |           |                                   |                        |                          |   |                                                |                           |                        |                         |                |    |         |    |         |

|    |                                                                                                                                                                                                                                                                                                                                                             |                                                                                                                                                                                                                                                                                                                                                                                           |                                                                                                                                                                                                                                                                                                                                                                                                                                                         |   |                               |                      |                              |                |                                |    |                |                             |   |                |                                |    |                 |         |
|----|-------------------------------------------------------------------------------------------------------------------------------------------------------------------------------------------------------------------------------------------------------------------------------------------------------------------------------------------------------------|-------------------------------------------------------------------------------------------------------------------------------------------------------------------------------------------------------------------------------------------------------------------------------------------------------------------------------------------------------------------------------------------|---------------------------------------------------------------------------------------------------------------------------------------------------------------------------------------------------------------------------------------------------------------------------------------------------------------------------------------------------------------------------------------------------------------------------------------------------------|---|-------------------------------|----------------------|------------------------------|----------------|--------------------------------|----|----------------|-----------------------------|---|----------------|--------------------------------|----|-----------------|---------|
|    | Show the field ONLY if: [intersections] = '0' or [arcurves_type(2)] = '1' and [intersect_count] = '1' or [intersect_count] = '2' or [intersect_count] = '3' or [intersect_count] = '4' or [intersect_count] = '5' or [intersect_count] = '6' or [intersect_count] = '99'                                                                                    |                                                                                                                                                                                                                                                                                                                                                                                           | <table border="1"> <tr> <td>0</td> <td>Sag curve - large dip in road</td> </tr> <tr> <td>1</td> <td>Summit curve - top of a hill</td> </tr> <tr> <td>2</td> <td>Not applicable</td> </tr> <tr> <td>99</td> <td>Unknown</td> </tr> </table>                                                                                                                                                                                                              | 0 | Sag curve - large dip in road | 1                    | Summit curve - top of a hill | 2              | Not applicable                 | 99 | Unknown        |                             |   |                |                                |    |                 |         |
| 0  | Sag curve - large dip in road                                                                                                                                                                                                                                                                                                                               |                                                                                                                                                                                                                                                                                                                                                                                           |                                                                                                                                                                                                                                                                                                                                                                                                                                                         |   |                               |                      |                              |                |                                |    |                |                             |   |                |                                |    |                 |         |
| 1  | Summit curve - top of a hill                                                                                                                                                                                                                                                                                                                                |                                                                                                                                                                                                                                                                                                                                                                                           |                                                                                                                                                                                                                                                                                                                                                                                                                                                         |   |                               |                      |                              |                |                                |    |                |                             |   |                |                                |    |                 |         |
| 2  | Not applicable                                                                                                                                                                                                                                                                                                                                              |                                                                                                                                                                                                                                                                                                                                                                                           |                                                                                                                                                                                                                                                                                                                                                                                                                                                         |   |                               |                      |                              |                |                                |    |                |                             |   |                |                                |    |                 |         |
| 99 | Unknown                                                                                                                                                                                                                                                                                                                                                     |                                                                                                                                                                                                                                                                                                                                                                                           |                                                                                                                                                                                                                                                                                                                                                                                                                                                         |   |                               |                      |                              |                |                                |    |                |                             |   |                |                                |    |                 |         |
| 32 | <p>abridges</p> <p>Show the field ONLY if: [intersections] = '0' or [intersect_count] = '1' or [intersect_count] = '2' or [intersect_count] = '3' or [intersect_count] = '4' or [intersect_count] = '5' or [intersect_count] = '6' or [intersect_count] = '99'</p>                                                                                          | Presence of Bridges on road a                                                                                                                                                                                                                                                                                                                                                             | <p>radio</p> <table border="1"> <tr> <td>0</td> <td>No</td> </tr> <tr> <td>1</td> <td>Yes</td> </tr> <tr> <td>99</td> <td>Unknown</td> </tr> </table>                                                                                                                                                                                                                                                                                                   | 0 | No                            | 1                    | Yes                          | 99             | Unknown                        |    |                |                             |   |                |                                |    |                 |         |
| 0  | No                                                                                                                                                                                                                                                                                                                                                          |                                                                                                                                                                                                                                                                                                                                                                                           |                                                                                                                                                                                                                                                                                                                                                                                                                                                         |   |                               |                      |                              |                |                                |    |                |                             |   |                |                                |    |                 |         |
| 1  | Yes                                                                                                                                                                                                                                                                                                                                                         |                                                                                                                                                                                                                                                                                                                                                                                           |                                                                                                                                                                                                                                                                                                                                                                                                                                                         |   |                               |                      |                              |                |                                |    |                |                             |   |                |                                |    |                 |         |
| 99 | Unknown                                                                                                                                                                                                                                                                                                                                                     |                                                                                                                                                                                                                                                                                                                                                                                           |                                                                                                                                                                                                                                                                                                                                                                                                                                                         |   |                               |                      |                              |                |                                |    |                |                             |   |                |                                |    |                 |         |
| 33 | <p>avisibility</p> <p>Show the field ONLY if: [intersections] = '0' or [intersect_count] = '1' or [intersect_count] = '2' or [intersect_count] = '3' or [intersect_count] = '4' or [intersect_count] = '5' or [intersect_count] = '6' or [intersect_count] = '99'</p>                                                                                       | <p>Inadequate visibility on road a</p> <p><i>Stand at the point you are evaluating and look down each road. If you notice that something is causing limited visibility you should estimate the number of car lengths between where you stand and the visibility problem occurs. Document this in the next question that pops up if you select one of the poor visibility options.</i></p> | <p>checkbox</p> <table border="1"> <tr> <td>0</td> <td>avisibility__0</td> <td>No - good visibility</td> </tr> <tr> <td>1</td> <td>avisibility__1</td> <td>Yes - blocked by Plants / tree</td> </tr> <tr> <td>2</td> <td>avisibility__2</td> <td>Yes - blocked by a building</td> </tr> <tr> <td>3</td> <td>avisibility__3</td> <td>Yes - limited by shape of road</td> </tr> <tr> <td>99</td> <td>avisibility__99</td> <td>Unknown</td> </tr> </table> | 0 | avisibility__0                | No - good visibility | 1                            | avisibility__1 | Yes - blocked by Plants / tree | 2  | avisibility__2 | Yes - blocked by a building | 3 | avisibility__3 | Yes - limited by shape of road | 99 | avisibility__99 | Unknown |
| 0  | avisibility__0                                                                                                                                                                                                                                                                                                                                              | No - good visibility                                                                                                                                                                                                                                                                                                                                                                      |                                                                                                                                                                                                                                                                                                                                                                                                                                                         |   |                               |                      |                              |                |                                |    |                |                             |   |                |                                |    |                 |         |
| 1  | avisibility__1                                                                                                                                                                                                                                                                                                                                              | Yes - blocked by Plants / tree                                                                                                                                                                                                                                                                                                                                                            |                                                                                                                                                                                                                                                                                                                                                                                                                                                         |   |                               |                      |                              |                |                                |    |                |                             |   |                |                                |    |                 |         |
| 2  | avisibility__2                                                                                                                                                                                                                                                                                                                                              | Yes - blocked by a building                                                                                                                                                                                                                                                                                                                                                               |                                                                                                                                                                                                                                                                                                                                                                                                                                                         |   |                               |                      |                              |                |                                |    |                |                             |   |                |                                |    |                 |         |
| 3  | avisibility__3                                                                                                                                                                                                                                                                                                                                              | Yes - limited by shape of road                                                                                                                                                                                                                                                                                                                                                            |                                                                                                                                                                                                                                                                                                                                                                                                                                                         |   |                               |                      |                              |                |                                |    |                |                             |   |                |                                |    |                 |         |
| 99 | avisibility__99                                                                                                                                                                                                                                                                                                                                             | Unknown                                                                                                                                                                                                                                                                                                                                                                                   |                                                                                                                                                                                                                                                                                                                                                                                                                                                         |   |                               |                      |                              |                |                                |    |                |                             |   |                |                                |    |                 |         |
| 34 | <p>avisibility_length</p> <p>Show the field ONLY if: [intersections] = '0' or [avisibility(1)] = '1' or [avisibility(2)] = '1' or [avisibility(3)] = '1' and [intersect_count] = '1' or [intersect_count] = '2' or [intersect_count] = '3' or [intersect_count] = '4' or [intersect_count] = '5' or [intersect_count] = '6' or [intersect_count] = '99'</p> | How many car lengths until visibility is reduced on road a?                                                                                                                                                                                                                                                                                                                               | text                                                                                                                                                                                                                                                                                                                                                                                                                                                    |   |                               |                      |                              |                |                                |    |                |                             |   |                |                                |    |                 |         |



|     |                                                                                                     |                                                                                                                                                                                                                                                                                                                                                                                                                                                                                                                                           |                                                                                                                                                                                                                                                                                                                                                                                                                                                                                                                                                                                                                                                                                                                                                                                                                                                                                                                                 |   |                 |                              |               |                 |                               |   |                 |                |   |                 |                                 |   |                 |                 |   |                 |           |   |                 |                         |   |                 |                      |   |                 |                                         |    |                  |        |    |                  |         |
|-----|-----------------------------------------------------------------------------------------------------|-------------------------------------------------------------------------------------------------------------------------------------------------------------------------------------------------------------------------------------------------------------------------------------------------------------------------------------------------------------------------------------------------------------------------------------------------------------------------------------------------------------------------------------------|---------------------------------------------------------------------------------------------------------------------------------------------------------------------------------------------------------------------------------------------------------------------------------------------------------------------------------------------------------------------------------------------------------------------------------------------------------------------------------------------------------------------------------------------------------------------------------------------------------------------------------------------------------------------------------------------------------------------------------------------------------------------------------------------------------------------------------------------------------------------------------------------------------------------------------|---|-----------------|------------------------------|---------------|-----------------|-------------------------------|---|-----------------|----------------|---|-----------------|---------------------------------|---|-----------------|-----------------|---|-----------------|-----------|---|-----------------|-------------------------|---|-----------------|----------------------|---|-----------------|-----------------------------------------|----|------------------|--------|----|------------------|---------|
| 180 | <p>fpedestrians<br/>Show the field ONLY if: [intersect_count] = '6' or [intersect_count] = '99'</p> | <p>Crossing of Pedestrians on road f<br/><i>Mark all the things you see that are designed to make it safer for pedestrians to use the road that you are analyzing</i></p> <p><b>Question number 180 content would be equivalent to analysis of a single road A number 35, each of the questions would be repeated for the total roads that enter a hotspot junction</b></p>                                                                                                                                                               | <p>checkbox</p> <table border="1"> <tr> <td>0</td> <td>fpedestrians__0</td> <td>No pedestrian crossing tools</td> </tr> <tr> <td>1</td> <td>fpedestrians__1</td> <td>Traffic light for pedestrians</td> </tr> <tr> <td>2</td> <td>fpedestrians__2</td> <td>Central median</td> </tr> <tr> <td>3</td> <td>fpedestrians__3</td> <td>protection of walkways by walls</td> </tr> <tr> <td>4</td> <td>fpedestrians__4</td> <td>Zebra crossings</td> </tr> <tr> <td>5</td> <td>fpedestrians__5</td> <td>Sidewalks</td> </tr> <tr> <td>7</td> <td>fpedestrians__7</td> <td>Lighted zebra crossings</td> </tr> <tr> <td>8</td> <td>fpedestrians__8</td> <td>Note of school zones</td> </tr> <tr> <td>9</td> <td>fpedestrians__9</td> <td>Pedestrian Lane on the road for walking</td> </tr> <tr> <td>90</td> <td>fpedestrians__90</td> <td>Others</td> </tr> <tr> <td>99</td> <td>fpedestrians__99</td> <td>Unknown</td> </tr> </table> | 0 | fpedestrians__0 | No pedestrian crossing tools | 1             | fpedestrians__1 | Traffic light for pedestrians | 2 | fpedestrians__2 | Central median | 3 | fpedestrians__3 | protection of walkways by walls | 4 | fpedestrians__4 | Zebra crossings | 5 | fpedestrians__5 | Sidewalks | 7 | fpedestrians__7 | Lighted zebra crossings | 8 | fpedestrians__8 | Note of school zones | 9 | fpedestrians__9 | Pedestrian Lane on the road for walking | 90 | fpedestrians__90 | Others | 99 | fpedestrians__99 | Unknown |
| 0   | fpedestrians__0                                                                                     | No pedestrian crossing tools                                                                                                                                                                                                                                                                                                                                                                                                                                                                                                              |                                                                                                                                                                                                                                                                                                                                                                                                                                                                                                                                                                                                                                                                                                                                                                                                                                                                                                                                 |   |                 |                              |               |                 |                               |   |                 |                |   |                 |                                 |   |                 |                 |   |                 |           |   |                 |                         |   |                 |                      |   |                 |                                         |    |                  |        |    |                  |         |
| 1   | fpedestrians__1                                                                                     | Traffic light for pedestrians                                                                                                                                                                                                                                                                                                                                                                                                                                                                                                             |                                                                                                                                                                                                                                                                                                                                                                                                                                                                                                                                                                                                                                                                                                                                                                                                                                                                                                                                 |   |                 |                              |               |                 |                               |   |                 |                |   |                 |                                 |   |                 |                 |   |                 |           |   |                 |                         |   |                 |                      |   |                 |                                         |    |                  |        |    |                  |         |
| 2   | fpedestrians__2                                                                                     | Central median                                                                                                                                                                                                                                                                                                                                                                                                                                                                                                                            |                                                                                                                                                                                                                                                                                                                                                                                                                                                                                                                                                                                                                                                                                                                                                                                                                                                                                                                                 |   |                 |                              |               |                 |                               |   |                 |                |   |                 |                                 |   |                 |                 |   |                 |           |   |                 |                         |   |                 |                      |   |                 |                                         |    |                  |        |    |                  |         |
| 3   | fpedestrians__3                                                                                     | protection of walkways by walls                                                                                                                                                                                                                                                                                                                                                                                                                                                                                                           |                                                                                                                                                                                                                                                                                                                                                                                                                                                                                                                                                                                                                                                                                                                                                                                                                                                                                                                                 |   |                 |                              |               |                 |                               |   |                 |                |   |                 |                                 |   |                 |                 |   |                 |           |   |                 |                         |   |                 |                      |   |                 |                                         |    |                  |        |    |                  |         |
| 4   | fpedestrians__4                                                                                     | Zebra crossings                                                                                                                                                                                                                                                                                                                                                                                                                                                                                                                           |                                                                                                                                                                                                                                                                                                                                                                                                                                                                                                                                                                                                                                                                                                                                                                                                                                                                                                                                 |   |                 |                              |               |                 |                               |   |                 |                |   |                 |                                 |   |                 |                 |   |                 |           |   |                 |                         |   |                 |                      |   |                 |                                         |    |                  |        |    |                  |         |
| 5   | fpedestrians__5                                                                                     | Sidewalks                                                                                                                                                                                                                                                                                                                                                                                                                                                                                                                                 |                                                                                                                                                                                                                                                                                                                                                                                                                                                                                                                                                                                                                                                                                                                                                                                                                                                                                                                                 |   |                 |                              |               |                 |                               |   |                 |                |   |                 |                                 |   |                 |                 |   |                 |           |   |                 |                         |   |                 |                      |   |                 |                                         |    |                  |        |    |                  |         |
| 7   | fpedestrians__7                                                                                     | Lighted zebra crossings                                                                                                                                                                                                                                                                                                                                                                                                                                                                                                                   |                                                                                                                                                                                                                                                                                                                                                                                                                                                                                                                                                                                                                                                                                                                                                                                                                                                                                                                                 |   |                 |                              |               |                 |                               |   |                 |                |   |                 |                                 |   |                 |                 |   |                 |           |   |                 |                         |   |                 |                      |   |                 |                                         |    |                  |        |    |                  |         |
| 8   | fpedestrians__8                                                                                     | Note of school zones                                                                                                                                                                                                                                                                                                                                                                                                                                                                                                                      |                                                                                                                                                                                                                                                                                                                                                                                                                                                                                                                                                                                                                                                                                                                                                                                                                                                                                                                                 |   |                 |                              |               |                 |                               |   |                 |                |   |                 |                                 |   |                 |                 |   |                 |           |   |                 |                         |   |                 |                      |   |                 |                                         |    |                  |        |    |                  |         |
| 9   | fpedestrians__9                                                                                     | Pedestrian Lane on the road for walking                                                                                                                                                                                                                                                                                                                                                                                                                                                                                                   |                                                                                                                                                                                                                                                                                                                                                                                                                                                                                                                                                                                                                                                                                                                                                                                                                                                                                                                                 |   |                 |                              |               |                 |                               |   |                 |                |   |                 |                                 |   |                 |                 |   |                 |           |   |                 |                         |   |                 |                      |   |                 |                                         |    |                  |        |    |                  |         |
| 90  | fpedestrians__90                                                                                    | Others                                                                                                                                                                                                                                                                                                                                                                                                                                                                                                                                    |                                                                                                                                                                                                                                                                                                                                                                                                                                                                                                                                                                                                                                                                                                                                                                                                                                                                                                                                 |   |                 |                              |               |                 |                               |   |                 |                |   |                 |                                 |   |                 |                 |   |                 |           |   |                 |                         |   |                 |                      |   |                 |                                         |    |                  |        |    |                  |         |
| 99  | fpedestrians__99                                                                                    | Unknown                                                                                                                                                                                                                                                                                                                                                                                                                                                                                                                                   |                                                                                                                                                                                                                                                                                                                                                                                                                                                                                                                                                                                                                                                                                                                                                                                                                                                                                                                                 |   |                 |                              |               |                 |                               |   |                 |                |   |                 |                                 |   |                 |                 |   |                 |           |   |                 |                         |   |                 |                      |   |                 |                                         |    |                  |        |    |                  |         |
| 181 | density                                                                                             | <p>If you are at a junction choose the road that seems to have the most traffic and look down one direction of it. In a rondpoint look at the traffic in the circle. Using the clock on your tablet click on the hourglass shape and type 2 then 0 then 0 again. This will start a timer of 2 minutes during which you must count the following items. If you think it is possible you can count more than one during each 2 minute period, it will be easiest to write the results in your notepad then enter the numbers in redcap.</p> | descriptive                                                                                                                                                                                                                                                                                                                                                                                                                                                                                                                                                                                                                                                                                                                                                                                                                                                                                                                     |   |                 |                              |               |                 |                               |   |                 |                |   |                 |                                 |   |                 |                 |   |                 |           |   |                 |                         |   |                 |                      |   |                 |                                         |    |                  |        |    |                  |         |
| 182 | density_level                                                                                       | <p>Heavy or light traffic<br/><i>You will need to perform density counts at each location at a heavy and a light traffic time. There is a different survey with the same questions about density that you can complete in addition to this one. If on this one it is a heavy traffic time you should complete the other density survey during a low traffic time.</i></p>                                                                                                                                                                 | <p>radio</p> <table border="1"> <tr> <td>0</td> <td>Light traffic</td> </tr> <tr> <td>1</td> <td>Heavy traffic</td> </tr> </table>                                                                                                                                                                                                                                                                                                                                                                                                                                                                                                                                                                                                                                                                                                                                                                                              | 0 | Light traffic   | 1                            | Heavy traffic |                 |                               |   |                 |                |   |                 |                                 |   |                 |                 |   |                 |           |   |                 |                         |   |                 |                      |   |                 |                                         |    |                  |        |    |                  |         |
| 0   | Light traffic                                                                                       |                                                                                                                                                                                                                                                                                                                                                                                                                                                                                                                                           |                                                                                                                                                                                                                                                                                                                                                                                                                                                                                                                                                                                                                                                                                                                                                                                                                                                                                                                                 |   |                 |                              |               |                 |                               |   |                 |                |   |                 |                                 |   |                 |                 |   |                 |           |   |                 |                         |   |                 |                      |   |                 |                                         |    |                  |        |    |                  |         |
| 1   | Heavy traffic                                                                                       |                                                                                                                                                                                                                                                                                                                                                                                                                                                                                                                                           |                                                                                                                                                                                                                                                                                                                                                                                                                                                                                                                                                                                                                                                                                                                                                                                                                                                                                                                                 |   |                 |                              |               |                 |                               |   |                 |                |   |                 |                                 |   |                 |                 |   |                 |           |   |                 |                         |   |                 |                      |   |                 |                                         |    |                  |        |    |                  |         |
| 183 | <p>density_heavy<br/>Show the field ONLY if: [density_level] = '1'</p>                              | <p>Is the traffic so heavy that vehicles are barely moving?</p>                                                                                                                                                                                                                                                                                                                                                                                                                                                                           | <p>yesno</p> <table border="1"> <tr> <td>1</td> <td>Yes</td> </tr> <tr> <td>0</td> <td>No</td> </tr> </table>                                                                                                                                                                                                                                                                                                                                                                                                                                                                                                                                                                                                                                                                                                                                                                                                                   | 1 | Yes             | 0                            | No            |                 |                               |   |                 |                |   |                 |                                 |   |                 |                 |   |                 |           |   |                 |                         |   |                 |                      |   |                 |                                         |    |                  |        |    |                  |         |
| 1   | Yes                                                                                                 |                                                                                                                                                                                                                                                                                                                                                                                                                                                                                                                                           |                                                                                                                                                                                                                                                                                                                                                                                                                                                                                                                                                                                                                                                                                                                                                                                                                                                                                                                                 |   |                 |                              |               |                 |                               |   |                 |                |   |                 |                                 |   |                 |                 |   |                 |           |   |                 |                         |   |                 |                      |   |                 |                                         |    |                  |        |    |                  |         |
| 0   | No                                                                                                  |                                                                                                                                                                                                                                                                                                                                                                                                                                                                                                                                           |                                                                                                                                                                                                                                                                                                                                                                                                                                                                                                                                                                                                                                                                                                                                                                                                                                                                                                                                 |   |                 |                              |               |                 |                               |   |                 |                |   |                 |                                 |   |                 |                 |   |                 |           |   |                 |                         |   |                 |                      |   |                 |                                         |    |                  |        |    |                  |         |
| 184 | density_cars                                                                                        | Count the number of cars                                                                                                                                                                                                                                                                                                                                                                                                                                                                                                                  | text                                                                                                                                                                                                                                                                                                                                                                                                                                                                                                                                                                                                                                                                                                                                                                                                                                                                                                                            |   |                 |                              |               |                 |                               |   |                 |                |   |                 |                                 |   |                 |                 |   |                 |           |   |                 |                         |   |                 |                      |   |                 |                                         |    |                  |        |    |                  |         |
| 185 | density_trucks                                                                                      | Count the number of large trucks                                                                                                                                                                                                                                                                                                                                                                                                                                                                                                          | text                                                                                                                                                                                                                                                                                                                                                                                                                                                                                                                                                                                                                                                                                                                                                                                                                                                                                                                            |   |                 |                              |               |                 |                               |   |                 |                |   |                 |                                 |   |                 |                 |   |                 |           |   |                 |                         |   |                 |                      |   |                 |                                         |    |                  |        |    |                  |         |
| 186 | density_bikes                                                                                       | Count the number of bicycles                                                                                                                                                                                                                                                                                                                                                                                                                                                                                                              | text                                                                                                                                                                                                                                                                                                                                                                                                                                                                                                                                                                                                                                                                                                                                                                                                                                                                                                                            |   |                 |                              |               |                 |                               |   |                 |                |   |                 |                                 |   |                 |                 |   |                 |           |   |                 |                         |   |                 |                      |   |                 |                                         |    |                  |        |    |                  |         |
| 187 | density_motos                                                                                       | Count the number of motos                                                                                                                                                                                                                                                                                                                                                                                                                                                                                                                 | text                                                                                                                                                                                                                                                                                                                                                                                                                                                                                                                                                                                                                                                                                                                                                                                                                                                                                                                            |   |                 |                              |               |                 |                               |   |                 |                |   |                 |                                 |   |                 |                 |   |                 |           |   |                 |                         |   |                 |                      |   |                 |                                         |    |                  |        |    |                  |         |

|     |                           |                                                                                                                                                                                                                                                                                     |                                                                                                                                                                     |   |            |   |            |   |          |
|-----|---------------------------|-------------------------------------------------------------------------------------------------------------------------------------------------------------------------------------------------------------------------------------------------------------------------------------|---------------------------------------------------------------------------------------------------------------------------------------------------------------------|---|------------|---|------------|---|----------|
| 188 | density_big_bus           | Count the number of big busses                                                                                                                                                                                                                                                      | text                                                                                                                                                                |   |            |   |            |   |          |
| 189 | density_coasters          | Count the number of coasters                                                                                                                                                                                                                                                        | text                                                                                                                                                                |   |            |   |            |   |          |
| 190 | density_taxi_bus          | Count the number of taxi busses                                                                                                                                                                                                                                                     | text                                                                                                                                                                |   |            |   |            |   |          |
| 191 | density_peda_crossing     | Count the number of pedestrians crossing the road                                                                                                                                                                                                                                   | text                                                                                                                                                                |   |            |   |            |   |          |
| 192 | density_peds_road         | Count the number of pedestrians walking in the road                                                                                                                                                                                                                                 | text                                                                                                                                                                |   |            |   |            |   |          |
| 193 | density_turns             | Count the number of turns you see from a non-turning lane<br><i>An example is at sopetrade, where the right lane is intended to be used for cars traveling straight through the junction but often people make turns from that lane instead of waiting in the left turning lane</i> | text                                                                                                                                                                |   |            |   |            |   |          |
| 194 | density_bike_helmet       | Count the number of bicyclists you see wearing any kind of helmet                                                                                                                                                                                                                   | text                                                                                                                                                                |   |            |   |            |   |          |
| 195 | density_bike_helmet_odd   | Count the number of bicyclists you see wearing a helmet that is clearly not designed for biking<br><i>like a hard hat that is usually used on a construction site</i>                                                                                                               | text                                                                                                                                                                |   |            |   |            |   |          |
| 196 | density_motos_helmet      | Count the number of moto drivers or passengers NOT wearing a helmet                                                                                                                                                                                                                 | text                                                                                                                                                                |   |            |   |            |   |          |
| 197 | density_motos_strap_pass  | Count the number of moto passengers not using the strap properly<br><i>This includes the strap being unbuckled or buckled so loose that you are able to see at least 3 cm of space between the strap and the chin</i>                                                               | text                                                                                                                                                                |   |            |   |            |   |          |
| 198 | density_motos_strap_drive | Count the number of moto drivers not using the strap properly<br><i>This includes the strap being unbuckled or buckled so loose that you are able to see at least 3 cm of space between the strap and the chin</i>                                                                  | text                                                                                                                                                                |   |            |   |            |   |          |
| 199 | density_motos_white       | Count the number of moto drivers or passengers wearing a white helmet                                                                                                                                                                                                               | text                                                                                                                                                                |   |            |   |            |   |          |
| 200 | density_motos_lights      | Count the number of motos that are running their headlights during the day                                                                                                                                                                                                          | text                                                                                                                                                                |   |            |   |            |   |          |
| 201 | density_motos_vision      | Count the number of moto drivers with obscured vision due to a cracked or painted faceshield                                                                                                                                                                                        | text                                                                                                                                                                |   |            |   |            |   |          |
| 202 | comments                  | Please type any other comments you have this hotspot - you can leave this blank if you have nothing to add                                                                                                                                                                          | text                                                                                                                                                                |   |            |   |            |   |          |
| 203 | bea_complete              | Complete?                                                                                                                                                                                                                                                                           | dropdown<br><table border="1"> <tr> <td>0</td> <td>Incomplete</td> </tr> <tr> <td>1</td> <td>Unverified</td> </tr> <tr> <td>2</td> <td>Complete</td> </tr> </table> | 0 | Incomplete | 1 | Unverified | 2 | Complete |
| 0   | Incomplete                |                                                                                                                                                                                                                                                                                     |                                                                                                                                                                     |   |            |   |            |   |          |
| 1   | Unverified                |                                                                                                                                                                                                                                                                                     |                                                                                                                                                                     |   |            |   |            |   |          |
| 2   | Complete                  |                                                                                                                                                                                                                                                                                     |                                                                                                                                                                     |   |            |   |            |   |          |
